# 1 **Vectored Immunoprophylaxis and Treatment of SARS-** 2 **CoV-2 Infection**

3  
4 Takuya Tada<sup>1</sup>, Belinda M. Dcosta<sup>1</sup>, Julia Minnee<sup>1</sup> and Nathaniel R. Landau<sup>1</sup>

5  
6 Affiliation:

7 <sup>1</sup>Department of Microbiology, NYU Grossman School of Medicine, New York, NY, USA.

8  
9  
10 #Corresponding author:

11 Nathaniel R. Landau, Ph.D.

12 NYU Grossman School of Medicine

13 430 East 29th Street, Alexandria West Building, Rm 509, New York, NY 10016

14 Email: [nathaniel.landau@med.nyu.edu](mailto:nathaniel.landau@med.nyu.edu)

15 Phone: (212) 263-9197

16

17 Keywords: SARS-CoV-2, AAV vector, lentiviral vector, Immunoprophylaxis, ACE2, decoy,  
18 variants

19 **Summary**

20 Vectored immunoprophylaxis was first developed as a means to establish engineered immunity  
21 to HIV through the use of an adeno-associated viral vector expressing a broadly neutralizing  
22 antibody. We have applied this concept to establish long-term prophylaxis against SARS-CoV-2  
23 by adeno-associated and lentiviral vectors expressing a high affinity ACE2 decoy receptor.  
24 Administration of decoy-expressing AAV vectors based on AAV2.retro and AAV6.2 by intranasal  
25 instillation or intramuscular injection protected mice against high-titered SARS-CoV-2 infection.  
26 AAV and lentiviral vectored immunoprophylaxis was durable and active against recent SARS-  
27 CoV-2 Omicron subvariants. The AAV vectors were also effective when administered up to 24  
28 hours post-infection. Vectored immunoprophylaxis could be of value for immunocompromised  
29 individuals for whom vaccination is not practical and as a means to rapidly establish protection  
30 from infection. Unlike monoclonal antibody therapy, the approach is expected to remain active  
31 despite continued evolution viral variants.

## 32 **Introduction**

33 The concept of vectored immunoprophylaxis was first proposed as an approach to establish  
34 protection against HIV infection by the vectored expression of a broadly neutralizing antibody<sup>1</sup>,  
35 replacing the need to derive a vaccine immunogen capable of eliciting such antibodies. The  
36 approach has since been found to be effective as a therapeutic approach to suppressing virus  
37 replication the nonhuman primate SIV model using adeno-associated viruses (AAV) vectors  
38 expressing broadly neutralizing antibodies and is currently in clinical trials as a means to suppress  
39 HIV replication in infected individuals<sup>2,3</sup>.

40  
41 Vectored immunoprophylaxis for SARS-CoV-2 through the expression of neutralizing monoclonal  
42 antibodies is problematic because of the extraordinarily rapid evolution of the virus. Monoclonal  
43 antibody therapy has been highly successful for the treatment of severe COVID-19, decreasing  
44 hospitalization and deaths<sup>4</sup> but has been largely sidelined by the extraordinarily rapid appearance  
45 of viral variants that escape neutralization. The first Omicron variant, BA.1, contained 34  
46 mutations in the spike protein, most of which were within or close to the spike protein receptor  
47 binding domain and allowed for escape from most of the therapeutic monoclonal antibodies. The  
48 Regeneron REGN-COV2 cocktail, a cocktail of REGN10933 and REGN10987 monoclonal  
49 antibodies, and the Lilly LY-CoV555 potently neutralize the earlier variants of concern (Alpha,  
50 Beta, Gamma and Delta) but their IC<sub>50</sub>s against the Omicron BA.1 variant was greatly increased<sup>5-</sup>  
51 <sup>14</sup>. Vir/GSK VIR-7831 (Sotrovimab) was thought to maintain neutralizing activity against Omicrons  
52 BA.1 and BA.2 but was later found to be 10.5- and 340-fold decreased in neutralizing activity  
53 against the variants<sup>8-10,12,14,15</sup>. Lilly LY-CoV1404 maintained neutralizing titer against BA.1, BA.2  
54 and BA.4/5<sup>16</sup> but fails to neutralize the more recent, further mutated Omicron variants BQ1.1 and  
55 XBB<sup>17</sup>. The extraordinarily rapid evolution of the virus is likely to continue over the next several

56 years, imposing a challenge to the development of monoclonal antibodies from which the virus  
57 cannot escape. The rapidity of virus evolution is also a challenge for the design of effective  
58 vaccines.

59

60 A strategy to inhibit virus entry that is less subject to escape by novel variants is that of receptor  
61 decoys. The strategy is based on soluble forms of the protein, fused to the Fc domain of an  
62 immunoglobulin heavy chain to increase its half-life *in vivo*<sup>18</sup>. While viruses can mutate epitopes  
63 in the spike protein driven by selective pressure to escape neutralization by antibodies elicited  
64 from previous infection or vaccination, the spike protein needs to conserve high affinity binding to  
65 its receptor, thereby preserving the neutralizing activity of the receptor decoy. Receptor decoys  
66 were first developed as a therapeutic for HIV infection<sup>19,20</sup>. A recombinant protein consisting of  
67 the ectodomain of CD4 fused to an immunoglobulin Fc domain was found to bind the viral  
68 envelope glycoprotein gp120 with high affinity and potently neutralize the virus *in vitro* but in  
69 clinical trials the protein showed no benefit. More recently, the concept was revived by Gardner  
70 *et al.* who showed that an enhanced eCD4-Ig protected rhesus macaques from multiple  
71 challenges with SIV<sup>3</sup>.

72

73 Receptor decoys for SARS-CoV-2 based on soluble forms of ACE2 have been developed by  
74 several groups<sup>21-28</sup>. We previously reported the development of a receptor decoy protein termed  
75 an “ACE2 microbody” in which the ACE2 ectodomain is fused to the CH3 domain of a human  
76 immunoglobulin IgG1 heavy chain Fc region<sup>21</sup>. The decoy proteins, administered by intranasal  
77 (i.n.) instillation, have been shown in mouse and hamster models to protect from infection when  
78 given shortly prior to infection and to therapeutically suppress virus replication when given up to  
79 about 12 hours post-infection<sup>29</sup>. The introduction of point mutations into the ACE2 spike protein

80 binding region of the decoy to increased its affinity for the spike further increased the effectiveness  
81 of the proteins<sup>22,24,26</sup>.

82

83 Here, we applied vectored immunoprophylaxis to SARS-CoV-2 using AAV and lentiviral vector  
84 vectors expressing a modified high affinity ACE2 microbody. AAV2.retro and AAV6.2 vectors,  
85 administered either i.n. or by intramuscular (i.m.) injection, provided a high degree of protection  
86 in ACE2 transgenic and Balb/c mouse models. The protection was long-lasting and was effective  
87 against recent Omicron variants. The AAV vectors were also effective therapeutically when  
88 administered shortly post-infection. The lentiviral vector-based decoy was also effective at  
89 suppressing virus replication, providing protection that showed no sign of diminishing two months  
90 after i.n. administration. Decoy vectored-immunoprophylaxis could be a highly useful means to  
91 protect immunocompromised individuals for whom vaccination is less effective and could offer a  
92 therapy that remains active against new variants as the emerge.

93 **Results**

94 **Decoy-expressing AAV vectors inhibit SARS-CoV-2 infection.**

95 To determine the feasibility of vectored prophylaxis for SARS-CoV-2, we constructed AAV vectors  
96 expressing an ACE2 receptor decoy. The decoy, termed ACE2.1mb, is similar to the ACE2  
97 microbody we previously reported<sup>21</sup> that consists of the ACE2 ectodomain fused to a single CH3  
98 domain of an IgG1 heavy chain Fc domain (**Figure 1A**). The protein has been modified by the  
99 introduction of point mutations in the ACE2 spike protein binding region that were reported by  
100 Chen *et al.* to increase affinity for the spike protein<sup>22</sup> and by the introduction of an H345A point  
101 mutation that inactivates its catalytic activity<sup>30</sup>. The coding sequence was cloned into an AAV  
102 vector containing a CAG promoter and virus stock was produced with AAV2.retro and AAV6.2  
103 capsids. AAV2 and AAV6 are reported to have tropism for cells of the mouse and human lung  
104 and airway<sup>31-33</sup>. AAV2.retro is a variant of AAV2 that was selected for increased tropism for the  
105 central nervous system (CNS) and retrograde movement in axons<sup>34,35</sup>. It has not been reported  
106 to transduce lung cells but in pilot experiments, we found that it worked surprisingly well (not  
107 shown). AAV6.2 is a variant of AAV6 that contains a single F129L mutation that was found to  
108 increase the efficiency of mouse and human airway cell transduction<sup>36</sup>. The ability of the vectors  
109 to protect cells from SARS-CoV-2 infection was tested in the lung cell-line A549.ACE2 and the  
110 microglial cell-line CHME3.ACE2. The cells were transduced with serial dilutions of the decoy  
111 vectors and then challenged 5 days later with D614G, BA.1, BA.2, BA.2.75, BA.4/5 and BQ.1  
112 spike protein-pseudotyped lentiviruses carrying a luciferase reporter genome. At 2 days post-  
113 infection (dpi), luciferase activity in the cultures was measured. The results showed that both  
114 decoy-expressing AAVs protected A549.ACE2 and CHME3.ACE2 cells from infection (**Figure**  
115 **1B**). Virus with the D614G spike was the most potently neutralized by the decoy while BA.2 was  
116 the most resistant, with a 20-33-fold higher ID<sub>50</sub> (defined as the multiplicity of infection (MOI) that

117 resulted in a 50% decrease in luciferase activity). The low ID<sub>50</sub> required to block infection indicates  
118 that the decoy was active on bystander cells and that it was not necessary to transduce all of the  
119 cells in order to protect the culture.

120

121 The ability of the decoy-expressing vectors to inhibit SARS-CoV-2 live virus replication was tested  
122 on A549.ACE2, CHME3.ACE2 and hSABCI-NS1.1 cells. The latter is a human small airway basal  
123 cell-line grown in air-liquid interface culture conditions and differentiated into mature airway  
124 epithelium cell-types the model the respiratory tract. The cells were transduced with decoy-  
125 expressing or control GFP.nLuc AAV2.retro and AAV6.2 vectors and challenged a day later with  
126 SARS-CoV-2 WA1/2020. Virus replication was measured by RT-qPCR quantification of cell-  
127 associated viral RNA copies. The 3 cell-lines supported high levels of SARS-CoV-2 replication  
128 (**Figure 1C left**). Transduction of the CHME3.ACE2 cells with either of the AAV vectors resulted  
129 in a 4-5 log decrease in viral RNA, a level that was not significantly higher than uninfected cells.  
130 Transduction of the cells by the control AAV had no effect on SARS-CoV-2 replication. The results  
131 in the A549.ACE2 cells were similar (**Figure 1C right**). The vectors were also effective in the  
132 hSABCI-NS1.1 human small airway basal cultures although the decrease was less pronounced  
133 (50-100-fold) most likely because the cells did not support virus replication as high as in the other  
134 cell-lines. The AAV6.2 vector was somewhat more effective than the AAV2.retro vector (**Figure**  
135 **1D**). Production of the decoy protein by the transduced CHME3.ACE2 and A549.ACE2 cells was  
136 confirmed by pull-down of the protein from the culture supernatant on anti-His tag coated  
137 magnetic beads and immunoblot analysis (**Figure 1E**). The CHME3.ACE2 cells were found to  
138 produce about 2-fold more decoy than A549.ACE2 which may have contributed to the greater  
139 extent of protection in these cells. The concentration of the decoy protein in the culture medium  
140 was 0.2-0.6 µg/ml, a concentration that was greater than the IC<sub>50</sub> 0.15 µg/ml<sup>21</sup>.

141

142 **Vectored immunoprophylaxis *in vivo* by decoy-expressing AAV-vectors**

143 The feasibility of vectored immunoprophylaxis for SARS-CoV-2 with the decoy-expressing AAV

144 vectors was tested in transgenic and non-transgenic mouse models. Decoy-expressing and

145 control GFP AAV2.retro and AAV6.2 vectors were administered to human ACE2 K18 transgenic

146 mice (hACE2 K18 Tg) i.n., i.v. or i.m. After 3 days, the mice were challenged with SARS-CoV-2

147 WA1/2020 and virus loads in the lung were measured 3-dpi (**Figure 2A**). The results showed that

148 vector administration i.n. strongly suppressed virus replication in the mice, decreasing the virus

149 load by 5-logs, a level that was indistinguishable from uninfected mice (**Figure 2B**). The control

150 vectors had no effect on virus loads. Histology showed that the lungs of infected untreated mice

151 had prominent signs of interstitial pneumonia with thickened alveolar septa and inflammatory cell

152 infiltration while the lungs of decoy-expressing AAV vectors-treated mice showed no signs of

153 pneumonia and were free of infiltrating inflammatory cells (**Figure 2C**). The lungs of mice treated

154 with the decoy AAV vectors alone in the absence of SARS-CoV-2 infection were clear, indicating

155 that the decoy vectors themselves did not cause pulmonary inflammation (**Figure 2C**). Treatment

156 with the decoy vectors prevented the characteristic loss of body mass associated with untreated

157 SARS-CoV-2 infection (**Figure 2D**). A concern regarding vectored immunoprophylaxis is that the

158 decoy protein or the vectors themselves might induce inflammatory responses in the lungs;

159 however, analysis of proinflammatory and anti-inflammatory cytokine levels (IFN $\alpha$ , IL-10, TNF $\alpha$ ,

160 IL12-p70, IL-6 and MCP-1) showed no induction of these cytokines following administration of the

161 vectors (**Figure S1**).

162

163 To test the effectiveness of the decoy vectors in protecting against the Omicron variants, Balb/c

164 mice, which support high level replication of SARS-CoV-2 Omicron variants through the



165 endogenous murine ACE2<sup>37,38</sup>, were treated i.n. with decoy-expressing AAV or control AAV2.retro  
166 or AAV6.2 vector and then challenged with Omicrons BA.1, BA.2 or BA.5. The results showed  
167 that i.n. administration of decoy-expressing AAV vectors caused a dramatic decrease in virus  
168 loads as compared to the control vectors (**Figure 2E**). The decoy-expressing vectors were most  
169 effective against the BA.5 variant, decreasing the virus load 1,000-fold and least effective against  
170 BA.2, decreasing virus load 100-fold (**Figure 2E**), a pattern that was similar to what was found  
171 with the pseudotyped lentiviruses *in vitro*. Both AAV vectors were effective although the  
172 AAV2.retro seemed to be slightly more suppressive against all three Omicrons. This conclusion  
173 was confirmed in a dose-response analysis which showed that the decoy-expressing AAV2.retro  
174 vector was about 10-fold more effective at virus load suppression. A 10,000-fold decrease in virus  
175 load required  $1 \times 10^{10}$  vector genomes (vg) for AAV2.retro. The same degree of suppression by  
176 AAV6.2 required  $1 \times 10^{11}$  vg (**Figure S2**).

177  
178 Administration of the vectors i.n. delivered the vectors to the relevant organ but it was possible  
179 that delivery by routes that targeted a different site in the body might also be effective given that  
180 the decoy protein is stable *in vivo* and freely diffusible<sup>29</sup>. In support of this approach, i.m. delivery  
181 of AAV-vectored immunoprophylaxis was effective for the suppression of SIV replication in the  
182 macaque model<sup>39</sup>. We therefore tested the effectiveness of i.v. and i.m. administration of the  
183 decoy-expressing AAV vectors (**Figure 2A**). The results showed that i.m. administration was  
184 highly effective, decreasing the virus load by 5-logs compared to control vector, a level that was  
185 indistinguishable from uninfected mice (**Figure 2F**). I.v. administration was much less effective,  
186 decreasing the virus load by only a 2-logs.

187

188 **Therapeutic use of vectored immunoprophylaxis for SARS-CoV-2.**

189 The studies described above tested the prophylactic effect of the decoy-expressing AAVs  
190 administered prior to SARS-CoV-2 infection. It was possible that the approach might also be  
191 effective therapeutically by administration post-infection. The effectiveness of administration post-  
192 infection would depend on how soon post-infection they were administered and how fast the  
193 vectors transduced lung cells and produced the encoded protein to establish an inhibitory  
194 concentration in the respiratory tract. To determine this, we infected mice with SARS-CoV-2 and  
195 then treated them at increasing times post-infection (**Figure 2G**). The results showed that the  
196 decoy-expressing vectors were effective when administered concomitant with SARS-CoV-2 and  
197 up to 12 hours post-infection (**Figure 2G**). The treatment was partially effective at 24-hours and  
198 lost efficacy at 48-hours. The results demonstrate remarkably rapid transduction and biosynthesis  
199 of the decoy protein by the AAV vectors. While this time course would appear to be too short to  
200 be of therapeutic use, the kinetics closely mirror what is seen in monoclonal antibody therapy of  
201 SARS-CoV-2 in mouse models<sup>111118</sup> suggesting that in humans, where the time-course of  
202 disease is slower, the AAV vectors might act with the kinetics similar to that of highly effective  
203 monoclonal antibodies.

204

#### 205 **AAV decoy-expressing vectored immunoprophylaxis is highly durable.**

206 Although AAV does not integrate at a significant frequency into the host cell genome, the genome  
207 remains stable in the host cell. In nonhuman primates and in clinical trials, AAV vectors have been  
208 shown to maintain long-term expression of an encoded gene *in vivo*<sup>40</sup>. To test the durability of the  
209 decoy-expressing AAV vectors, we constructed AAV2.retro and AAV6.2 vectors that expressed  
210 a decoy-luciferase fusion protein. The vectors were administered i.n. to mice and the mice were  
211 live-imaged over the next 30 days. Expression by both vectors in the lungs was first detected 24  
212 hours post-treatment and then increased to maximal by day 3 (**Figure 3A**). Expression levels

213 remained stable through day 14 after which they decreased slightly by day 30. Measurement of  
214 luciferase activity in tissue homogenates further demonstrated durable expression by the vectors  
215 (**Figure 3B**). The decoy proteins were readily detectable on day 1 and the following day,  
216 expression increased 25-fold. To determine the durability of viral load suppression by the vectors,  
217 mice were treated and then challenged with SARS-CoV-2 over a 30-day period. The results  
218 showed that the decoy-expressing vectors strongly suppressed the virus loads of mice infected  
219 that had been infected up to 30-days post-treatment (**Figure 3C**). Virus load suppression  
220 appeared to begin to wane 30 days post-treatment but was still highly active, with the AAV2.retro  
221 vector suppressing virus load nearly 1000-fold. The results were consistent with the slight  
222 decrease in *in vivo* expression levels found for the decoy-luciferase fusion protein.

223

224 **Increased durability of vectored immunoprophylaxis with a decoy-expressing lentiviral**  
225 **vector.**

226 The waning of protection established by the AAV vectors at 30 days led us to test whether a  
227 different vector might be able to extend the durability protection. The use of an alternative vector  
228 was also of interest in light of concerns about the possibly of pre-existing immunity to AAV in  
229 some individuals noted in clinical trials<sup>41</sup>. Lentiviral vectors are generally not subject to pre-existing  
230 immunity in humans. Moreover, because lentiviruses integrate into the host cell genome, the  
231 vectors are maintained stably in the cell and in daughter cells that may be generated, allowing for  
232 the possibility of long-term decoy expression and increased durability of protection. In addition,  
233 pseudotyping of the vectors by VSV-G results in a broad target cell tropism. To test the feasibility  
234 of lentiviral vectored immunoprophylaxis, we constructed a decoy-expressing lentiviral vector and  
235 compared its effectiveness to the AAV vectors. Transduction of A549.ACE2 and CHME3.ACE2  
236 cells with the vector showed that it expressed the decoy protein at a level similar to those of the

237 AAV vectors as measured in the supernatant pull-down assay (**Figure S3**). To determine the  
238 potency of the protection, the cell-lines were transduced with a serial of the decoy-expressing  
239 lentiviral vector and then challenged with the D614G and Omicron spike protein-pseudotyped  
240 reporter viruses. The results showed that vector was highly protective against all of the variants  
241 (**Figure 4A**). Overall, the potency of virus neutralization, calculated by the MOI required to  
242 decrease infection by 50%, was very similar to that of the AAV vectors. As for the AAV vectors,  
243 BA.2 was the most resistant to neutralization (8-fold in CHME3.ACE2 and 5.8-fold in A549.ACE2)  
244 (**Figure 4A, below**). The ability of the vectors to neutralize the viruses at low MOIs confirmed that  
245 only a small fraction of the cells needed to be transduced to protect the entire population.

246

247 To determine whether the decoy-expressing lentiviral vector could establish vectored  
248 immunoprophylaxis, the vector was administered i.v. or i.n. and after 7 days, the mice were  
249 challenged with WA1/2020 or Omicron BA.1. Virus loads in the lung were quantified 3-dpi (**Figure**  
250 **4B, left**). In mice challenged with WA1/2020, i.v. injection resulted in a nearly 5-log decrease in  
251 virus load while administration i.n. further decreased the virus load to undetectable levels (**Figure**  
252 **4B, middle**). The analysis of proinflammatory and anti-inflammatory cytokine levels (IFN $\alpha$ , IL-10,  
253 TNF $\alpha$ , IL12-p70, IL-6 and MCP-1) showed that administration of the lentiviral vector had no  
254 significant effect on the levels of these cytokines (**Figure S1**). A dose-response analysis in which  
255 mice were administered decreasing amounts of the vector i.v. or i.n. confirmed the great efficacy  
256 of i.n. administration; at a dose of  $1 \times 10^6$  IU, virus loads were 100-fold lower in mice treated i.n.  
257 compared to i.v. (**Figure S4**). Treatment with the vector also protected against Omicron BA.1 but  
258 did not suppress virus replication to as great an extent, resulting in low level virus replication in  
259 mice treated i.v. or i.n. To compare the protective effect of the vector with that of a therapeutic  
260 monoclonal antibody, mice were administered the highly potent neutralizing monoclonal antibody

261 LY-CoV1404 by i.v. and i.n. routes and then infected with the Omicron BA.1 variant. The results  
262 showed that the monoclonal antibody decreased the virus loads more effectively i.n. than i.v. but  
263 was not as effective as the lentiviral vector (**Figure 4B, right**). To test the durability of lentiviral  
264 vectored immunoprophylaxis, mice were treated i.v. or i.n. with decoy-expressing or control GFP-  
265 expressing lentiviral vector and challenged 7, 30 and 60 days later with SARS-CoV-2 WA1/2020.  
266 The protection was found to persist over the 60-day time-course (**Figure 4C**). I.n. administration  
267 of the vector caused a greater decrease in virus loads which interestingly, became even more  
268 pronounced over time.

269  
270 To understand the basis of the long-lasting protection provided by lentiviral vectored  
271 immunoprophylaxis, we administered a GFP/luciferase-expressing lentiviral vector i.v. or i.n. and  
272 determined the level of expression over the 60-day time-course by measuring luciferase activity  
273 in cell lysates prepared from different tissues. The results showed that i.v administration resulted  
274 in high level expression in the spleen at day-7 and moderate expression in the lungs and liver  
275 (400-fold less in lung and 50-fold less in liver). The expression levels remained constant over the  
276 time-course (**Figure 4D**). There was no detectable expression in nasal tissue and trachea.  
277 Administration of the vector i.n. resulted in high level expression in the lung, moderate levels in  
278 the trachea (about 30-fold less on day 7) and nasal tissue. Levels in the spleen and liver were  
279 undetectable. Expression levels remained constant at 30-days. At 60-days, expression in the lung  
280 increased about 8-fold, a finding that could explain the increase in virus load suppression at this  
281 time-point in mice treated by i.n. administration of the vector (**Figure 4C**).

282

283 **Comparison of lung cell-types transduced by the AAV and lentiviral vectors.**

284 The effectiveness and longevity of the vectored immunoprophylaxis depends both upon the cell-  
285 types and half-lives of the cells transduced by the vectors. To understand the basis of durable  
286 protection, we characterized the cell-types transduced in the lung by the AAV and lentiviral  
287 vectors. Mice were administered GFP-expressing AAV and lentiviral vectors i.n. and the GFP+  
288 cells. The lungs were harvested 3 days later and the cells disaggregated. The cells were then  
289 analyzed by flow cytometry using antibodies that distinguished various pulmonary cell-types. The  
290 results showed that the majority of the cells transduced in the lungs by AAV2.retro and AAV6.2  
291 were epithelial (79.5% and 94.2%, respectively) (**Figure 5A**). Of the cells transduced by  
292 AAV2.retro, 20.5% were leukocytes while AAV6.2 transduced fewer leukocytes (5.8%). Analysis  
293 of the transduced leukocytes showed that the majority of cells were interstitial macrophages and  
294 neutrophils with smaller proportions of T cells, B cells, DCs, monocytes and alveolar  
295 macrophages. The distribution of leukocytes transduced by AAV6.2 was roughly similar. The  
296 lentiviral vector targeted a larger proportion of leukocytes (57%). Of the transduced leukocytes,  
297 the greatest proportion were DCs (26.3%) with substantial contributions from B cells (20.7%) and  
298 monocytes (18.5%) (**Figure 5B**). It is possible that the long-lasting expression by the lentiviral  
299 vector resulted from the increased transduction of leukocytes, particularly of the DCs, as these  
300 cells are thought to be long-lived residents in the lung<sup>42</sup>.

301 **Discussion**

302 Vectored prophylaxis was first developed as an approach to protect against HIV infection<sup>1</sup> in  
303 which broadly neutralizing antibody was expressed in an AAV vector and was later expanded to  
304 the use of an enhanced CD4-Ig fusion protein that established a high degree of resistance to SIV  
305 infection in treated macaques<sup>2,3</sup>. We report here that that vectored expression of a high affinity  
306 ACE2 microbody protein in which the ectodomain of ACE2 was mutated to increase its affinity for  
307 the viral spike protein and inactivate catalytic activity fused to the CH3 domain of an IgG heavy  
308 chain Fc<sup>21</sup> established a high degree of protection from SARS-CoV-2 in mouse models. Decoy-  
309 expressing AAV2.retro and AAV6.2 vectors were both highly effective at establishing vectored  
310 immunoprophylaxis in ACE2 K18 Tg and Balb/c mice. Mice treated with the decoy-expressing  
311 AAV2.retro and AAV6.2 vectors were highly resistant to SARS-CoV-2 infection. Upon challenge  
312 with high titered SARS-CoV-2 WA1/2020, viral RNA in the lungs 3-dpi was undetectable,  
313 corresponding to a >10,000-fold decrease in virus loads; the lungs of the treated mice were free  
314 of infiltrating leukocytes; there was no sign of pulmonary inflammation and the mice did not  
315 experience the decrease in body weight that normally occurs in untreated or control vector-treated  
316 mice. Delivery of the decoy by a lentiviral vector was as effective and appeared to be even more  
317 durable. The vectors were well-tolerated; they did not disturb myeloid or lymphoid cell populations  
318 and did not cause T cell activation or increased levels of proinflammatory cytokines in the sera.  
319 The vectors established protection against a broad range of SARS-CoV-2 variants including the  
320 recent Omicron subvariants BA.2.75, BA.4/5 and BQ.1. Protection was strongest against virus  
321 with the parental D614G spike protein and somewhat less effective against the BA.2 variant, an  
322 effect that was probably due to the relative decrease in spike protein affinity for ACE2<sup>16</sup>.

323

324 Administration of the decoy-expressing AAV2.retro and AAV6.2 vectors by i.n. instillation  
325 suppressed virus replication in the mice for at least 30 days. The effectiveness of i.n.  
326 administration of the AAV2.retro vector, which was somewhat greater than the AAV6.2 vector,  
327 was surprising as its capsid was selected for high efficiency transduction of the CNS and  
328 retrograde transport in neurons<sup>34,35</sup>; its tropism for the respiratory tract has not, to our knowledge,  
329 been previously described. The tropism of the AAV2.retro vector for lung and neuronal cells could  
330 be clinically advantageous as a means to suppress SARS-CoV-2 replication in respiratory and  
331 olfactory tissues. SARS-CoV-2 infection of ACE2 K18 Tg results in high virus loads in the brain  
332 which was suppressed by administration of the decoy-expressing AAV2.retro vector (not shown).  
333 Imaging of mice following administration of a luciferase-expressing AAV2.retro vector showed  
334 transduction of the olfactory region of the brain (not shown).

335  
336 In a previous report, Sims *et al.*, used an AAV-expressed high affinity ACE2 decoy to protect mice  
337 from SARS-CoV-2 infection<sup>53</sup>. In that study, i.n. administration of a decoy-expressing AAVhu.68  
338 vector caused a 30-fold decrease in Wuhan-Hu-1 SARS-CoV-2 virus load 7-dpi but at 4-dpi,  
339 close to the time at which virus loads peak, had no significant effect on virus loads. In contrast,  
340 we found that i.n. or i.m. administration of decoy-expressing AAV2.retro or AAV6.2 vectors  
341 decreased virus loads 10,000-100,000-fold at the time of peak virus load. The increased  
342 effectiveness of the therapy in our study does not appear to have resulted from differences in  
343 increased neutralizing activity of the decoys which appeared to be similar in both studies (IC50s  
344 (37 ng/ml vs 20 ng/ml<sup>29</sup>) or differences in vector dosage which also appeared to be similar. A  
345 potential explanation is that of more efficient transduction of respiratory tract cells by the  
346 AAV2.retro and AAV6.2 vectors.

347



348 The effectiveness of i.m. injection with the AAV2.retro vector was encouraging because clinically  
349 this route of administration may be more practical than i.n. instillation<sup>43</sup>. For reasons that are  
350 unclear, i.m. injection of the AAV2.retro vector was 3-logs more effective than injection by that  
351 route with the AAV6.2 vector. It is possible that the increased effectiveness of the vector was the  
352 result of retrograde transport of the AAV2.retro capsid in myocytes or simply caused by more  
353 efficient transduction of lung cells. The efficacy of i.m. injection of the vector suggests that decoy  
354 protein synthesized by transduced myocytes at the site of injection diffuses systemically,  
355 establishing a concentration in the respiratory tract sufficient to inhibit virus replication. Similarly,  
356 in the rhesus macaque SIV model, i.m. administration of AAV vectors expressing broadly  
357 neutralizing antibodies suppressed virus loads of SIV, a virus that replicates in secondary  
358 lymphoid organs<sup>3,39</sup>. The long-lasting suppression of SIV replication by the vector suggests that  
359 transduced terminally differentiated myocytes can produce AAV vector-encoded proteins for a  
360 period of several years. Similarly, i.m. administration of a decoy-expressing AAV vector could  
361 provide long-lived protection in humans. The protection could be more durable than that of the  
362 extended half-life monoclonal antibodies currently in clinical use<sup>44</sup>.

363  
364 Unexpectedly, the decoy-expressing AAVs were also effective therapeutically. I.n. instillation of  
365 the vectors as late as 24 hours post-SARS-CoV-2 infection suppressed virus replication, a time  
366 course similar to what is found in the treatment of mice with highly potent neutralizing monoclonal  
367 antibody<sup>8</sup>. The effectiveness of the decoy therapeutically demonstrates the rapid kinetics with  
368 which the vectors transduce cells in the lung and program biosynthesis of the encoded protein. In  
369 clinical practice, monoclonal antibody therapy is effective when given several days post-  
370 infection<sup>45</sup>. The similarity in the timing with which the AAV vectors and monoclonal antibodies can  
371 treat mice suggests that in humans, decoy-expressing AAV might be effective up to several days

372 post-infection, as is the case for the use of monoclonal antibodies. In mouse and hamster models,  
373 the administration of recombinant ACE2 decoy protein has previously been shown to be highly  
374 effective therapeutically<sup>28,46</sup>. The proteins do not require viral transduction or biosynthesis in the  
375 lung and thus are expected to act faster; however, in clinical practice, their use will require large  
376 quantities of highly pure recombinant protein which is not the case for vectored  
377 immunoprophylaxis.

378

379 Delivery of the decoy protein with a lentiviral vector was also highly effective for the establishment  
380 of vectored immunoprophylaxis. Like the AAV vectors, the lentiviral vector was most effective  
381 administered by i.n. instillation, Unlike the AAV vectors, the lentiviral vector was also effective by  
382 i.v. injection, a route that results mainly in the transduction of splenocytes, many of which are  
383 DCs<sup>47</sup>. Lentiviral vectored immunoprophylaxis appeared to be more durable than AAV vector,  
384 remaining fully intact through the 60-day time course. Interestingly, the level of virus load  
385 suppression intensified at the later time points, an effect that was probably the result of increased  
386 expression levels of the decoy in the in lung as demonstrated using a luciferase-expressing  
387 reporter vector. The parameters that affected the durability of protection by the two types of  
388 vectors are unclear. The AAV vectors transduced a significantly higher proportion of lung  
389 endothelial cells while the lentiviral vector high transduced a high proportion of leukocytes, many  
390 of which were DCs. Endothelial cells are mitotically active, thus diluting the AAV genome copy  
391 number over time. DCs are terminally differentiated and could remain resident in the lung for a  
392 long time.

393

394 AAV vectors are advantageous for clinical use because they are expressed long-term without  
395 integrating into the host cell genome and are replication-defective<sup>40,48-50</sup>. The vectors are currently

396 in use in a large number of clinical trials for a broad range of diseases. There are over 20 AAV  
397 serotypes, each with unique tissue tropism<sup>51</sup>. AAV6.2 is a variant of AAV6 that contains a single  
398 point mutation (F129L) introduced to increase lung cell tropism<sup>36</sup>. AAV2.retro is an AAV2 variant  
399 selected for retrograde transport in the CNS<sup>52</sup>. Both vectors administered i.n. protected mice from  
400 infection. AAV2.retro, which has not been reported to transduce cells of the respiratory system  
401 was, unexpectedly, somewhat more effective than AAV6.2. The majority of cells transduced by  
402 both vectors were lung the epithelial cells although AAV2.retro transduced a large proportion of  
403 neutrophils and monocytes.

404  
405 The decoy-expressing lentiviral vector also strong protected mice from infection. Lentiviral vectors  
406 are currently being developed for several clinical applications including CAR-T cells and SARS-  
407 CoV-2 vaccines<sup>54,55</sup>. The vectors offer long-term expression and are not generally subject to pre-  
408 existing immunity<sup>56</sup>. The protection established by i.n. administration of the decoy-expressing  
409 vector remained intact over the 60-day time-course and was somewhat longer-lasting than that  
410 of AAV vectored protection which started to wane after 30-days. The suppression of virus  
411 replication by the lentiviral vector increased somewhat towards the end of the time-course, an  
412 effect that was associated with a small increase in expression of the decoy-expressing lentiviral  
413 vector in the lung. The increased durability of lentiviral-vectored immunoprophylaxis is  
414 presumably the result of the transduction of a long-lived cell subpopulation in the lung although  
415 the identity of this subpopulation is unclear. The lentiviral vector mainly transduced lung  
416 leukocytes, many of which were DCs and monocytes that are thought to have short 2 day half-  
417 lives<sup>57,58</sup> and thus unlikely to account for the durable expression. The AAV vectors transduced a  
418 higher proportion of lung epithelial cells, a cell-type which in mice, has a much longer 17 month  
419 half-life<sup>59</sup>. Possible explanations for the long-lasting protection provided by the lentiviral vector are

420 that a long-lived, subpopulation of tissue resident DC or myeloid cells had been transduced or  
421 that integration of the vector allows for persistence of its genome in dividing cell subpopulations  
422 of the lung. In most clinical applications, lentiviral vectors are used to transduce cells *ex vivo* that  
423 are later re-infused, a procedure that has been generally viewed as low-risk. The safety profile of  
424 integrating lentiviral vectors for direct injection has not been fully established<sup>60-62</sup>.

425  
426 A potential application of vectored immunoprophylaxis for SARS-CoV-2 is as a means of providing  
427 protection to immunocompromised individuals for whom vaccination is less effective. Until  
428 recently, the most effective protection available for such individuals was the AstraZeneca  
429 Evusheld cocktail, a mixture of two monoclonal antibodies formulated for slow release by  
430 intramuscular injection<sup>44</sup>. However, the therapy may have become less effective as a result of  
431 immunoevasion by new Omicron subvariants. Both of the monoclonal antibodies in the cocktail  
432 have decreased neutralizing titers against the Omicrons BA.1 and BA.2<sup>5-14</sup> and recent findings  
433 suggest that they may be inactive against the increasingly prevalent BQ.1 and BA.2.75  
434 subvariants<sup>63</sup>. This decrease in neutralizing activity contrasts with the decoy which maintains its  
435 effectiveness against BQ.1 and BA.2.75.

436  
437 AAV-based vectored immunoprophylaxis was effective therapeutically in the mouse models when  
438 delivered within a 24-hour window post-infection. The short window is at least partially a function  
439 of the rapid kinetics of virus replication and clearance in the mouse model as compared to in  
440 humans. While the decoy-expressing AAV lost efficacy at later time points in the infected mouse,  
441 the loss of effect was coincident with that found for treatment with a highly potent therapeutic  
442 monoclonal antibody. Monoclonal antibody therapy has been found to lessen disease symptoms  
443 when given to patients several days post-infection<sup>45</sup>. If the comparison pertains in humans, the

444 window for which the AAV therapy remains effective in humans might be comparable to that for  
445 monoclonal antibody therapy.

446

447 Vectored immunoprophylaxis could be valuable in the case of a future pandemic spurred by the  
448 zoonosis of a novel coronavirus. Species such as bats and pangolins harbor large numbers of  
449 coronaviruses with the ability to use hACE2<sup>64,65</sup>. In the case of zoonosis of a coronavirus that used  
450 ACE2 as its entry receptor, the decoy-expressing vectors reported here would be ready as an off-  
451 the-shelf agent available prior to the production of a vaccine. The protection established by the  
452 vectors is more rapid than of vaccine as it does not require the induction of an immune response.  
453 In the case of zoonosis of a virus that used a receptor other than ACE2 or if a novel SARS-CoV-  
454 2 variant were to emerge that switched its receptor usage, the decoy receptor approach could  
455 also be applicable. This would involve the identification of the entry receptor for the novel virus  
456 and the construction of a soluble form of the protein to serve as a decoy. While a switch in receptor  
457 usage is possible, it has not happened to date despite strong selective pressure on the viral spike  
458 protein to alter its amino acid sequence.

459 **STAR Methods**

460 **Resource Availability**

461 **Lead Contact**

462 Further information and requests for resources and reagents should be directed to and will be  
463 fulfilled by the Lead Contact, Nathaniel R. Landau ([nathaniel.landau@med.nyu.edu](mailto:nathaniel.landau@med.nyu.edu)).

464

465 **Materials Availability**

466 All unique DNA constructs, proteins and pseudotyped virus generated in this study are available  
467 from the Lead Contact upon request.

468

469 **Data and Code Availability**

- 470 • The data used in this study are available upon request from the lead contact.
- 471 • This paper does not report original code.
- 472 • Any additional information required to reanalyze the data reported in this paper is  
473 available from the lead contact upon request.

474

475 **Experimental Model and Subject Details**

476

477 **Cells**

478 293T cells were cultured in DMEM/10% FBS. Clonal cell-lines CHME3.ACE2 and A549.ACE2  
479 were established by lipofection of CHME3 and A549 cells with plenti.ACE2<sup>6</sup> using  
480 lipofectamine2000 (Invitrogen). The cells were selected in 1 µg/ml puromycin and single cell  
481 clones were evaluated by flow cytometry for high ACE2 expression. CHME3.ACE2, A549.ACE2  
482 and ACE2.TMPRSS2.Vero E6 cells were maintained in medium with 1 µg/ml puromycin. hSABCI-

483 NS1.1 cells were differentiated in air-liquid interface cultures in transwell dishes at  $1.5 \times 10^5$   
484 cells/well. The cells were plated onto inserts coated with human type IV collagen (Sigma) in  
485 PneumaCult Ex Plus medium (Stemcell Technologies). The cells were cultured at 37 °C under  
486 5% CO<sub>2</sub>. The medium in the upper and lower chambers was changed one day after plating and  
487 the medium in the lower chamber was replaced every 2 days. The medium in the upper chamber  
488 was removed the apical surface was washed with PBS weekly for 2 weeks.

489

#### 490 **Mice**

491 C57BL/6 mice were from Taconic. Balb/c and hACE2 K18 Tg [B6.Cg-Tg(K18-ACE2)2PrImn/J]  
492 were from The Jackson Laboratory. Animal use and care was approved by the NYU Langone  
493 Health Institutional Animal Care and Use Committee (#170304) according to the standards set by  
494 the Animal Welfare Act.

495

#### 496 **Plasmids**

497 The expression vectors used for the production of AAV vectors were AAV.retro Rep/Cap2  
498 (Addgene 81070), Rep/Cap6 (Addgene 110770), pAdDeltaF6 (Addgene 112867) and pAAV-  
499 CAG-tdTomato. Rep/Cap6.2 expression plasmid was generated by overlap extension PCR using  
500 Rep/Cap6 template to introduce the F129L mutation. The amplicon was cloned into the EcoR-I  
501 and Nru-I sites of Rep/Cap6. To construct GFP/nanoluciferase-expressing AAV vectors pAAV-  
502 GFP.nLuc, pAAV-CAG-ACE2.1mb.nLuc and pAAV-CAG-ACE2.1mb, DNA fragments encoding  
503 GFP.nLuc, ACE2.1mb.nLuc and ACE2.1mb were amplified by PCR and joined by overlap  
504 extension PCR using primers containing Kpn-I and EcoR-I sites. The insert was removed from  
505 pAAV-CAG-tdTomato by cleavage with Kpn-I and EcoR-I and replaced with similarly cleaved  
506 amplicon. Decoy expression vector pcACE2.1mb has been previously described<sup>21</sup>. Expression

507 plasmids used to produce lentiviral pseudotypes were pMDL, pcVSV.G, pRSV.Rev, the lentiviral  
508 transfer vector plenti.GFP.nLuc<sup>6</sup>. Expression vectors for the SARS-CoV-2 D614G, Omicron BA.1,  
509 Omicron BA.2 spike proteins have been previously described<sup>9,12,21</sup>. Expression vectors for the  
510 Omicron BA.4/5, BA.2.75 and BQ.1 spike proteins were constructed by overlap extension PCR  
511 mutagenesis using the D614G<sup>5</sup> spike protein plasmid as template and cloned into pcDNA6.

512

### 513 **Method Details**

514

#### 515 **AAV vector stocks**

516 AAV vector stocks were produced by cotransfection of 293T cells with pAAV-CAG-ACE2.1mb,  
517 pAdDeltaF6 and AAV.retro RepCap2 or Rep/Cap6.2 at a ratio of 25:25:30 by the calcium  
518 phosphate method. Virus-containing supernatant was harvested 2 days post-transfection. The  
519 virus was concentrated by ultracentrifugation on 40% sucrose cushion at 4°C for 16 hours at  
520 30,000 x g, resuspended in PBS and concentrated on an Amicon Ultra Centrifugal Filter Unit  
521 (Millipore). Virus titers were measured by RT-qPCR with a primer pair and probe that hybridized  
522 to the AAV2 ITR sequences<sup>66</sup>.

523

#### 524 **SARS-CoV-2 virus stocks**

525 SARS-CoV-2 WA1/2020 (BEI Resources, NR-52281), Omicron BA.1 (BEI Resources, NR-  
526 56461), BA.2 (BEI Resources, NR-56781) and BA.5 virus (BEI Resources, NR-58616) stocks  
527 were prepared by infection of ACE2.TMPRSS2.Vero E6 cells at an MOI=0.05 (BEI Resources,  
528 NR-56781). 2 hours post-infection, the input virus was removed and a day later, the virus-  
529 containing supernatant was filtered through a 0.45 µm filter, concentrated on an Amicon Ultra  
530 Centrifugal Filter Unit (Millipore) and frozen at -80°C in aliquots.



531

### 532 **Decoy pull-down**

533 CHME3.ACE2 or A549.ACE2 cells ( $1 \times 10^6$ ) were infected with AAV2.retro, AAV6.2-ACE2.1mb  
534 or plenti.ACE2.1mb at MOI=0.5. The virus was removed the following day and the supernatant  
535 was harvested 3 days later. The decoy protein was pulled-down by a 1-hour incubation with 30  $\mu$ l  
536 nickel-nitrilotriacetic acid-agarose beads (QIAGEN) and eluted in Laemmle loading buffer. The  
537 protein was then analyzed on an immunoblot probed with anti-His antibody and horseradish  
538 peroxidase (HRP)-conjugated goat anti-mouse IgG secondary antibody (Sigma-Aldrich). The  
539 signals were developed with Immobilon Crescendo Western HRP Substrate (Millipore) and  
540 visualized on an iBright imaging system (Invitrogen).

541

### 542 **Pseudotype neutralization assay**

543 D614G, BA.1, BA.2, BA.2.75, BA.4/5 and BQ.1 spike protein-pseudotyped lentiviruses were  
544 generated by co-transfection of 293T cells with pMDL, pRSV.Rev, plenti.GFP.nLuc and spike  
545 protein expression vector and normalized for reverse transcriptase activity as previously  
546 described<sup>5</sup>. CHME3.ACE2 and A549.ACE2 cells were transduced with serially diluted decoy-  
547 expressing AAV or lentiviral vector. The medium was removed the following day and the cells  
548 were challenged with pseudotyped viruses (MOI=0.2). Luciferase activity in duplicate samples  
549 was measured 2-dpi in an Envision 2103 microplate luminometer (PerkinElmer).

550

### 551 **Flow cytometry**

552 GFP-expressing AAV or lentiviral vectors were injected into hACE2 K18 Tg (AAV) or SAMHD1  
553 Knockout mice (lentivirus) via i.n. injection. At 3-dpi, the lungs were homogenized in ACK buffer  
554 and the cells were disaggregated by a 30-minute treatment with 1.5 mg/mL collagenase and 0.1

555 mg/mL DNase followed by passage through a 0.22  $\mu$ m mesh. The cells were blocked with anti-  
556 CD16/CD32 and stained with Alexa 700-anti-CD45, PerCP-Cy5.5-anti-F4/80, APC-Cy7-SiglecF,  
557 PE-Cy7-anti-CD11c, PE-Cy7-anti-CD19, APC-anti-CD3, Pacblue-anti-CD11b, PE-Cy5.5-anti-  
558 CD62L, APC-anti-CD14 and PE-Ly6C/Ly6G (Gr1) (BioLegend) and analyzed on a Beckman  
559 CytoFLEX flow cytometer using with FlowJo software. Cell-types were classified as epithelial  
560 (CD45-), alveolar macrophages (CD45+, F4/80+, SiglecF+), interstitial macrophages (CD45+,  
561 F4/80+, SiglecF-), DCs (CD45+, F4/80-, CD11c+), T cells (CD45+, CD3+), B cells (CD45+,  
562 CD19+), monocytes (CD45+, CD11b+, CD14+) and neutrophils (CD45+, CD62L+, Ly6C/Ly6G+).  
563

#### 564 **Anti-inflammatory cytokine assay**

565 hACE2 K18 Tg were administrated  $1 \times 10^{12}$  vg decoy-expressing AAV or  $5 \times 10^6$  IU decoy-  
566 expressing lentiviral vector. Mice treated with AAV or lentiviral vector were challenged 3- or 7-  
567 days later, respectively, with  $2 \times 10^4$  PFU SARS-CoV-2 WA1/2020. Sera were harvested 3-dpi  
568 and IFN- $\gamma$ , MCP-1, TNF- $\alpha$ , IL-10, IL-12 and IL-6 were measured by cytokine bead array using the  
569 BD Cytometric Bead Array Mouse Inflammation Kit (BD Biosciences).  
570

#### 571 ***In vivo* and *in vitro* luciferase assays**

572 Balb/c or SAMHD1 knockout mice were administered AAV2.retro or AAV6.2-ACE2.1mb.nLuc ( $1 \times$   
573  $10^{12}$  vg) or plenti.GFP.nLuc ( $5 \times 10^6$  IU) by i.n. instillation. The mice were imaged over 30 days by  
574 the injection of 100  $\mu$ l 1:40 diluted Nano-Glo substrate (Nanolight) and visualization on an IVIS  
575 Lumina III XR (PerkinElmer). To measure luciferase activity in the tissues, organs were harvested  
576 and homogenized in lysing matrix D tubes with a FastPrep-24 5G homogenizer (MP Biomedicals).  
577 Nano-Glo Luciferase Assay Reagent (Nanolight) was added and luminescence was measured on  
578 an Envision 2103 plate reader (PerkinElmer).

579

580 **Live virus infection of cell-lines**

581 CHME3.ACE2, A549.ACE2 and hSABCI-NS1.1 cells ( $2 \times 10^5$ ) were infected with AAV2.retro or  
582 AAV6.2-ACE2.1mb at MOI=0.5. The medium was replaced 1-dpi and the following day, the cells  
583 were infected with SARS-CoV-2 at MOI=0.01. The cultures were lysed 2-dpi after which RNA was  
584 prepared and cell-associated viral RNA copies were quantified by reverse transcriptase RT-qPCR.  
585 Absolute RNA copy numbers were calculated using a standard curve generated by the analysis  
586 of a serially diluted *in vitro* transcribed synthetic subgenomic viral RNA using the  $2^{-\Delta\Delta CT}$  method.

587

588 **Prophylactic and therapeutic administration of decoy-expressing vectors.**

589 For prophylaxis experiment, 6-8 weeks old hACE2 K18 Tg or Balb/c mice were anesthetized with  
590 isoflurane or ketamine–xylazine cocktail and injected with 80  $\mu$ l (i.n. or i.v. or i.m.) ( $1 \times 10^{12}$  vg) of  
591 AAV2.retro or AAV6.2-decoy or  $5 \times 10^6$  IU of plenti.ACE2.1mb. After 1-30 days (AAV) and 1-60  
592 days (lentivirus vector) of infection, the mice were infected i.n. with  $2 \times 10^4$  plaque-forming unit  
593 (PFU) of SARS-CoV-2 WA1/2020 (hACE2 K18 Tg) or Omicron BA.1 or BA.2 or BA.5 (Balb/c). At  
594 2-dpi (Omicron) or 3-dpi (SARS-CoV-2 WA1/2020), the mice were sacrificed and RNA was  
595 prepared from 200  $\mu$ l of lung lysate using the Quick-RNA MiniPrep kit (Zymo Research). For  
596 therapeutic testing, hACE2 K18 Tg were infected i.n. with  $2 \times 10^4$  PFU SARS-CoV-2 WA1/2020.  
597 The mice were infected 0-48 hours post-infection i.n. with 80  $\mu$ l ( $1 \times 10^{12}$  vg) of AAV2.retro or  
598 AAV6.2-decoy. 3-dpi (SARS-CoV-2 WA1/2020), the mice were sacrificed and RNA was prepared  
599 from 200  $\mu$ l of the lung lysate using a Quick-RNA MiniPrep kit.

600

601 **Virus loads**

602 SARS-CoV-2 E gene subgenomic RNA levels were measured by reverse transcriptase RT-qPCR  
603 with a TaqMan probe. Lung RNA was mixed with TaqMan Fast Virus 1-step Master Mix (Applied  
604 Biosystems), 10 mM forward and reverse primers, and 2 mM probe. PCR cycles were 5 minutes  
605 at 50°C, 20 seconds at 95°C, 40 cycles of 3 seconds at 95°C, 3 seconds at 60°C). E gene  
606 subgenomic RNA copies were measured using forward primer subgenomic F  
607 (CGATCTCTTGATAGATCTGTTCTC), reverse primer E Sarbeco R and probe E Sarbeco P1)<sup>67,68</sup>.  
608 Tissue analyses were normalized to GAPDH mRNA copies measured using the mouse  
609 GAPDH.forward (CAATGTGTCCGTCGTGGATCT) and mouse GAPDH.reverse  
610 (GTCCTCAGTGTAGCCCAAGATG) with mouse GAPDH probe (FAM-  
611 CGTGCCGCCTGGAGAAACCTGCC-BHQ) or human GAPDH.forward  
612 (GTCTCCTCTGACTTCAACAGCG) and human GAPDH.reverse  
613 (ACCACCCTGTTGCTGTAGCCAA) with human GAPDH probe (FAM-TAGGAAGGACAGGCAAC-  
614 IBFQ). Absolute RNA copy numbers were calculated using a standard curve generated by the  
615 analysis of a serially diluted *in vitro* transcribed synthetic subgenomic viral RNA containing the E  
616 gene sequence (2019-nCoV\_E Positive Control, IDT: 10006896) using the 2- $\Delta\Delta$ CT method.

617

## 618 **Histology**

619 The lungs of SARS-CoV-2-infected mice were harvested 3-dpi. The tissue was fixed in 10%  
620 neutral buffered formalin for 72 hours at room temperature and then processed through graded  
621 ethanol, xylene and into paraffin in a Leica Peloris automated processor. 5  $\mu$ m paraffin-embedded  
622 sections were deparaffinized and stained with hematoxylin (Leica, 3801575) and eosin (Leica,  
623 3801619) on a Leica ST5020 automated histochemical stainer. Slides were scanned at 40 $\times$   
624 magnification on a Leica AT2 whole slide scanner and the images were transferred to the NYULH  
625 Omero web-accessible image database.

626

### 627 **Statistical Analysis**

628 Statistical significance was determined by Kruskal-Wallis test with post hoc Dunn's test.

629 Significance was calculated based on two-sided testing and is shown in the figures as the mean

630  $\pm$  SD with confidence intervals listed as \* $p < 0.05$ , \*\* $p < 0.01$ , \*\*\* $p < 0.001$ , \*\*\*\* $p < 0.0001$ .

631

### 632 **Study Approval**

633 Animal procedures were performed with the written approval of the NYU Animal Research

634 Committee in accordance with all federal, state, and local guidelines.

635

### 636 **Funding**

637 Funding was provided by the NIH (DA046100, AI122390, and AI120898). The Experimental

638 Pathology Research Laboratory is partially supported by the Cancer Center Support Grant

639 P30CA016087.

640

### 641 **Acknowledgements**

642 We thank Meike Dittman for ACE2.TMPRSS2.Vero E6 cells and the NYU Langone Laura and the

643 Isaac Perlmutter Cancer Center Experimental Pathology Research Laboratory for histology. We

644 thank David J. Simon (Weill Cornell Medicine) for providing AAV plasmids.

645

### 646 **Author Contributions**

647 T.T. and N.R.L. designed the experiments. T.T., B.M.D. and J.M. carried out the experiments. T.T.

648 and N.R.L. wrote the manuscript. N.R.L. supervised the study and revised the manuscript.

649 **Figure legends**

650

651 **Figure 1. AAV-ACE2.1mb prevents SARS-CoV-2 infection in cell culture.**

652 (A) The domain structure of full-length ACE2 is shown above with the ectodomain,  
653 transmembrane (TM) and intracellular domain (IC). The structure of the decoy consisting of the  
654 ACE2 ectodomain, human IgG1-CH3 and carboxy-terminal His tag. The ACE2 domain contains  
655 three high affinity mutations as described by Chan et al. and a H345A mutation in the ACE2  
656 peptidase catalytic site.

657 (B) A549.ACE2 and CHME3.ACE2 cells were transduced with a 5-fold serial dilution of  
658 AAV2.retro and AAV6.2 decoy vectors and then challenged with ancestral D614G, Omicron BA.1,  
659 BA.2, BA.2.75, BA.4/5 and BQ1 spike protein-pseudotyped lentiviral vectors. Luciferase activity  
660 was measured 2-dpi. The curves shown above indicate the infectivity based on luciferase activity  
661 normalized to mock vector-transduced cells. Each measurement is shown as the average of  
662 duplicates. The table below shows that  $ID_{50}$  calculated from the curves shown above.

663 (C) CHME3.ACE2 and A549.ACE2 cells were transduced with AAV2.retro-GFP.nLuc (GFP.Luc),  
664 AAV6.2-GFP.nLuc, AAV2.retro-ACE2.1mb, AAV6.2-ACE2.1mb at MOI=0.5. 2 days post  
665 transduction, the cells were infected with SARS-CoV-2 WA1/2020 (MOI=0.01). The cultures were  
666 lysed 2-dpi and RNA was prepared. Viral RNA copy numbers were determined by RT-qPCR.

667 (D) hSABCI-NS1.1 cells were transduced with AAV2.retro-GFP.nLuc, AAV6.2-GFP.nLuc,  
668 AAV2.retro-ACE2.1mb, AAV6.2-ACE2.1mb at MOI=0.5. 2 days post transduction, the cells were  
669 infected with SARS-CoV-2 WA1/2020 (MOI=0.01). The cultures were lysed 2-dpi and RNA was  
670 prepared. Viral RNA copy numbers were determined by RT-qPCR. Confidence intervals are  
671 shown as the mean  $\pm$  SD.  $**P \leq 0.01$ . The experiment was done twice with similar results.

672 (E) CHME3.ACE2 and A549.ACE2 cells were transduced with AAV2.retro or AAV6.2-ACE2.1mb  
673 at MOI=0.5. 3-dpi, secreted decoy protein in the supernatant was pulled-down on NTA beads and  
674 bead-bound decoy was detected on an immunoblot probed with His-tag antibody. Pure  
675 recombinant decoy protein is shown at right as a standard and was used to determine the amount  
676 of protein pulled-down, which is shown below each lane as micrograms decoy pulled-down from  
677 1 ml of culture supernatant. At right is shown decoy protein in the cell lysates is shown below with  
678 GAPDH as a loading control.

679

680 **Figure 2. Vectored immunoprophylaxis by decoy-expressing AAV decoy vector and**  
681 **therapeutic use.**

682 (A) The experimental scheme for testing decoy prophylaxis is diagrammed. hACE2 K18 Tg and  
683 Balb/c mice were treated by i.v. injection or i.n. instillation with decoy-expressing AAV vector or  
684 control GFP.nLuc-expressing AAV vector ( $1 \times 10^{12}$  vg). 3 days post-treatment, the hACE2 K18  
685 Tg mice were challenged with SARS-CoV-2 WA1/2020 and the Balb/c mice were challenged with  
686 Omicron BA.1, BA.2 or BA.5 ( $2 \times 10^4$  PFU). Viral RNA copies were quantified 2 days (Omicron)  
687 or 3 days (SARS-CoV-2 WA1/2020) post-infection.

688 (B) Mice (n=3-4) were treated with decoy-expressing or control GFP-expressing AAV vectors and  
689 challenged with SARS-CoV-2 WA1/2020. Viral RNA copies in the lungs were quantified 3-dpi.

690 (C) H&E stained lung sections from control and decoy-expressing AAV vectors and SARS-CoV-  
691 2 infected mice are shown on the left (2 x, scale bars 500 $\mu$ m) and with the boxed area enlarged  
692 on the right (20 x, scale bars 50 $\mu$ m).

693 (D) Mice (n=3) were treated with decoy-expressing AAV vectors on day 0 and challenged with  
694 SARS-CoV-2 WA1/2020 on day 3. Body weight was measured daily. As controls, the mice were

695 infected with SARS-CoV-2 WA1/2020 but not treated with AAV vector or treated with AAV vector  
696 but not infected with SARS-CoV-2 WA1/2020.

697 (E) Balb/c mice (n=3-4) were treated with decoy-expressing or GFP-expressing control AAV  
698 vectors and then infected 3 days later with Omicron BA.1, BA.2, or BA.5. Viral RNA copies in the  
699 lungs were quantified 2-dpi.

700 (F) Mice (n=4) were administered decoy-expressing AAV vectors i.m. or i.v. and challenged 3-dpi  
701 with SARS-CoV-2 WA1/2020. Infected but untreated and uninfected/untreated mice are included  
702 as controls.

703 G. Therapeutic use of the decoy-expressing AAV vectors was tested as diagrammed (left). hACE2  
704 K18 Tg (n=4) were infected with SARS-CoV-2 WA1/2020 ( $2 \times 10^4$  PFU) and then treated with  
705 decoy-expressing AAVs at time-points up to 48 hours post-infection. Viral RNA in the lung was  
706 quantified 3-dpi (right). As controls the mice were untreated (No AAV) or uninfected. Confidence  
707 intervals are shown as the mean  $\pm$  SD. \*\*\* $P \leq 0.001$ , \*\*\*\* $P \leq 0.0001$ . The experiment was done twice  
708 with similar results.

709

710 **Figure 3. Durable vectored immunoprophylaxis by decoy-expressing AAV vectors.**

711 (A) Balb/c mice (n=3) were injected i.n. with decoy-luciferase fusion protein-expressing AAV  
712 vectors ( $1 \times 10^{12}$  vg). Luciferase activity was visualized by live imaging over 30 days at the  
713 indicated time points. Representative images of a mouse from each group are shown.

714 (B) Luciferase activity in lung tissue homogenates from mice treated with the decoy-luciferase  
715 expressing AAV vectors (n=2) was measured over the time course.

716 (C) The experimental scheme to test the durability of AAV vectored immunoprophylaxis is  
717 diagrammed (left). hACE2 K18 Tg (n=4) were injected with AAV decoy. At 1-, 2-, 3-dpi, the mice  
718 were challenged with SARS-CoV-2 ( $2 \times 10^4$  PFU) and viral RNA in the lungs was quantified. The



719 results are shown as a histogram (right). SARS-CoV-2 infected/AAV untreated (No AAV) and AAV  
720 untreated/SARS-CoV-2 uninfected (Uninfected) controls are shown. Confidence intervals are  
721 shown as the mean  $\pm$  SD. \*\*\*\* $P \leq 0.0001$ . The experiment was done twice with similar results.

722

723 **Figure 4. Long-term vectored immunoprophylaxis by decoy-expressing lentiviral vector.**

724 (A) A549.ACE2 and CHME3.ACE2 cells were transduced with a 5-fold serial dilution of decoy-  
725 expressing lentiviral vectors and then challenged with D614G, Omicron BA.1, BA.2, 2.75, BA.4/5  
726 and BQ.1 spike protein-pseudotyped lentiviral vectors. Luciferase activity was measured 2-dpi  
727 (above). The curves indicate infectivity based on luciferase activity normalized to mock vector-  
728 transduced cells. Measurements are the average of duplicates. ID<sub>50</sub>s calculated from the curves  
729 are shown in the table (below).

730 (B) Structure of lentiviral vector and experimental scheme are shown. hACE2 K18 Tg mice or  
731 Balb/c were injected with lentiviral vector ( $5 \times 10^6$  IU) i.p., i.v. or i.n. injection. One week later, the  
732 mice were challenged with  $2 \times 10^4$  PFU of SARS-CoV-2 WA1/2020 (hACE2 K18 Tg) or Omicron  
733 (Omicron). Viral RNA in the lungs was quantified 3-dpi.

734 (C) Mice were administered luciferase-expressing lentiviral vector i.v. or i.n. (n=2). Tissues (nasal,  
735 lung, trachea, spleen and liver) were harvested and luciferase activity was measured over 60  
736 days at the indicated time-points.

737 (D) Decoy-expressing lentiviral vectors ( $5 \times 10^6$  IU) were administered i.v. or i.n. and after 7-, 30-  
738 and 60-days challenged with SARS-CoV-2 ( $2 \times 10^4$  PFU). Viral RNA was quantified 3-dpi.  
739 Confidence intervals are shown as the mean  $\pm$  SD. \*\* $P \leq 0.01$ , \*\*\*\* $P \leq 0.0001$ . The experiment was  
740 done twice with similar results.

741

742 **Figure 5. Comparison of lung cell subpopulations transduced by AAV and lentiviral vectors.**

743 (A) GFP-expressing AAV vectors were administrated i.n. After 3 days, the lungs were harvested  
744 and the tissue were enzymatically disaggregated. The cells were analyzed by multi-color flow  
745 cytometry with cell-type specific marker antibodies to distinguish subpopulations defined as  
746 follows: Leukocytes (CD45+), epithelial (CD45-), alveolar macrophages (CD45+, F4/80+,  
747 SiglecF+), interstitial macrophages (CD45+, F4/80+, SiglecF-), DCs (CD45+, F4/80-, CD11c+), T  
748 cells (CD45+, CD3+), B cells (CD45+, CD19+), monocytes (CD45+, CD11b+, CD14+),  
749 neutrophils (CD45+, CD62L+, Ly6C/Ly6G+). Representative flow cytometry plots of the GFP+  
750 cells and GFP+/CD45+ populations are shown on the left and the subpopulations within the  
751 GFP+/CD45+ leukocytes are shown in the pie charts on the right.

752 (B) Mice were administered GFP-expressing lentiviral vector i.n. GFP+ cells in the lung were  
753 analyzed by flow cytometry as in (A). Representative flow cytometry plots of the GFP+ cells and  
754 GFP+/CD45+ populations are shown on the left and the subpopulations within the GFP+/CD45+  
755 leukocytes are shown in the pie charts on the right.

756 **References**

- 757 1. Johnson, P.R., Schnepf, B.C., Zhang, J., Connell, M.J., Greene, S.M., Yuste, E.,  
758 Desrosiers, R.C., and Clark, K.R. (2009). Vector-mediated gene transfer engenders  
759 long-lived neutralizing activity and protection against SIV infection in monkeys. *Nat Med*  
760 *15*, 901-906. 10.1038/nm.1967.
- 761 2. Gardner, M.R. (2020). Promise and Progress of an HIV-1 Cure by Adeno-Associated  
762 Virus Vector Delivery of Anti-HIV-1 Biologics. *Front Cell Infect Microbiol* *10*, 176.  
763 10.3389/fcimb.2020.00176.
- 764 3. Gardner, M.R., Kattenhorn, L.M., Kondur, H.R., von Schaeuwen, M., Dorfman, T., Chiang,  
765 J.J., Haworth, K.G., Decker, J.M., Alpert, M.D., Bailey, C.C., et al. (2015). AAV-  
766 expressed eCD4-Ig provides durable protection from multiple SHIV challenges. *Nature*  
767 *519*, 87-91. 10.1038/nature14264.
- 768 4. Taylor, P.C., Adams, A.C., Hufford, M.M., de la Torre, I., Winthrop, K., and Gottlieb, R.L.  
769 (2021). Neutralizing monoclonal antibodies for treatment of COVID-19. *Nat Rev Immunol*  
770 *21*, 382-393. 10.1038/s41577-021-00542-x.
- 771 5. VanBlargan, L.A., Errico, J.M., Halfmann, P.J., Zost, S.J., Crowe, J.E., Jr., Purcell, L.A.,  
772 Kawaoka, Y., Corti, D., Fremont, D.H., and Diamond, M.S. (2022). An infectious SARS-  
773 CoV-2 B.1.1.529 Omicron virus escapes neutralization by therapeutic monoclonal  
774 antibodies. *Nat Med*. 10.1038/s41591-021-01678-y.
- 775 6. Liu, L., Iketani, S., Guo, Y., Chan, J.F.W., Wang, M., Liu, L., Luo, Y., Chu, H., Huang, Y.,  
776 Nair, M.S., et al. (2022). Striking antibody evasion manifested by the Omicron variant of  
777 SARS-CoV-2. *Nature* *602*, 676-681. 10.1038/s41586-021-04388-0.
- 778 7. Planas, D., Saunders, N., Maes, P., Guivel-Benhassine, F., Planchais, C., Buchrieser,  
779 J., Bolland, W.-H., Porrot, F., Staropoli, I., Lemoine, F., et al. (2021). Considerable

- 780 escape of SARS-CoV-2 Omicron to antibody neutralization. *Nature*. 10.1038/s41586-  
781 021-04389-z.
- 782 8. Dragoni, F., Schiaroli, E., Micheli, V., Fiaschi, L., Lai, A., Zehender, G., Rossetti, B.,  
783 Gismondo, M.R., Francisci, D., Zazzi, M., and Vicenti, I. (2022). Impact of SARS-CoV-2  
784 omicron BA.1 and delta AY.4.2 variants on the neutralization by sera of patients treated  
785 with different authorized monoclonal antibodies. *Clin Microbiol Infect*.  
786 10.1016/j.cmi.2022.03.005.
- 787 9. Zhou, H., Dcosta, B.M., Landau, N.R., and Tada, T. (2022). Resistance of SARS-CoV-2  
788 Omicron BA.1 and BA.2 Variants to Vaccine-Elicited Sera and Therapeutic Monoclonal  
789 Antibodies. *Viruses* 14. 10.3390/v14061334.
- 790 10. Iketani, S., Liu, L., Guo, Y., Liu, L., Chan, J.F.W., Huang, Y., Wang, M., Luo, Y., Yu, J.,  
791 Chu, H., et al. (2022). Antibody evasion properties of SARS-CoV-2 Omicron  
792 sublineages. *Nature* 604, 553-556. 10.1038/s41586-022-04594-4.
- 793 11. Chen, R.E., Winkler, E.S., Case, J.B., Aziati, I.D., Bricker, T.L., Joshi, A., Darling, T.L.,  
794 Ying, B., Errico, J.M., Shrihari, S., et al. (2021). In vivo monoclonal antibody efficacy  
795 against SARS-CoV-2 variant strains. *Nature* 596, 103-108. 10.1038/s41586-021-03720-  
796 y.
- 797 12. Tada, T., Zhou, H., Dcosta, B.M., Samanovic, M.I., Chivukula, V., Herati, R.S., Hubbard,  
798 S.R., Mulligan, M.J., and Landau, N.R. (2022). Increased resistance of SARS-CoV-2  
799 Omicron variant to neutralization by vaccine-elicited and therapeutic antibodies.  
800 *EBioMedicine* 78, 103944. 10.1016/j.ebiom.2022.103944.
- 801 13. Diamond, M., Halfmann, P., Maemura, T., Iwatsuki-Horimoto, K., Iida, S., Kiso, M.,  
802 Scheaffer, S., Darling, T., Joshi, A., Loeber, S., et al. (2021). The SARS-CoV-2

- 803 B.1.1.529 Omicron virus causes attenuated infection and disease in mice and hamsters.  
804 Res Sq. 10.21203/rs.3.rs-1211792/v1.
- 805 14. Bruel, T., Hadjadj, J., Maes, P., Planas, D., Seve, A., Staropoli, I., Guivel-Benhassine,  
806 F., Porrot, F., Bolland, W.H., Nguyen, Y., et al. (2022). Serum neutralization of SARS-  
807 CoV-2 Omicron sublineages BA.1 and BA.2 in patients receiving monoclonal antibodies.  
808 Nat Med. 10.1038/s41591-022-01792-5.
- 809 15. Touret, F., Baronti, C., Pastorino, B., Villarroel, P.M.S., Ninove, L., Nougairede, A., and  
810 de Lamballerie, X. (2022). In vitro activity of therapeutic antibodies against SARS-CoV-2  
811 Omicron BA.1, BA.2 and BA.5. Sci Rep 12, 12609. 10.1038/s41598-022-16964-z.
- 812 16. Cao, Y., Yisimayi, A., Jian, F., Song, W., Xiao, T., Wang, L., Du, S., Wang, J., Li, Q.,  
813 Chen, X., et al. (2022). BA.2.12.1, BA.4 and BA.5 escape antibodies elicited by Omicron  
814 infection. Nature 608, 593-602. 10.1038/s41586-022-04980-y.
- 815 17. Imai, M., Ito, M., Kiso, M., Yamayoshi, S., Uraki, R., Fukushi, S., Watanabe, S., Suzuki,  
816 T., Maeda, K., Sakai-Tagawa, Y., et al. (2022). Efficacy of Antiviral Agents against  
817 Omicron Subvariants BQ.1.1 and XBB. N Engl J Med. 10.1056/NEJMc2214302.
- 818 18. Czajkowsky, D.M., Hu, J., Shao, Z., and Pleass, R.J. (2012). Fc-fusion proteins: new  
819 developments and future perspectives. EMBO Mol Med 4, 1015-1028.  
820 10.1002/emmm.201201379.
- 821 19. Hodges, T.L., Kahn, J.O., Kaplan, L.D., Groopman, J.E., Volberding, P.A., Amman, A.J.,  
822 Arri, C.J., Bouvier, L.M., Mordenti, J., and Izu, A.E. (1991). Phase 1 study of  
823 recombinant human CD4-immunoglobulin G therapy of patients with AIDS and AIDS-  
824 related complex. Antimicrobial Agents and Chemotherapy 35, 2580-2586.  
825 doi:10.1128/AAC.35.12.2580.

- 826 20. Gershon, D. (1996). Genentech sheds gp120 vaccine. *Nature Medicine* 2, 370-371.  
827 10.1038/nm0496-370.
- 828 21. Tada, T., Fan, C., Chen, J.S., Kaur, R., Stapleford, K.A., Gristick, H., Dcosta, B.M.,  
829 Wilen, C.B., Nimigean, C.M., and Landau, N.R. (2020). An ACE2 Microbody Containing  
830 a Single Immunoglobulin Fc Domain Is a Potent Inhibitor of SARS-CoV-2. *Cell Rep* 33,  
831 108528. 10.1016/j.celrep.2020.108528.
- 832 22. Chan, K.K., Dorosky, D., Sharma, P., Abbasi, S.A., Dye, J.M., Kranz, D.M., Herbert,  
833 A.S., and Procko, E. (2020). Engineering human ACE2 to optimize binding to the spike  
834 protein of SARS coronavirus 2. *Science* 369, 1261-1265. 10.1126/science.abc0870.
- 835 23. Jing, W., and Procko, E. (2021). ACE2-based decoy receptors for SARS coronavirus 2.  
836 *Proteins* 89, 1065-1078. 10.1002/prot.26140.
- 837 24. Zhang, L., Narayanan, K.K., Cooper, L., Chan, K.K., Skeeters, S.S., Devlin, C.A.,  
838 Aguhob, A., Shirley, K., Rong, L., Rehman, J., et al. (2022). An ACE2 decoy can be  
839 administered by inhalation and potently targets omicron variants of SARS-CoV-2. *EMBO*  
840 *Molecular Medicine* 14, e16109. <https://doi.org/10.15252/emmm.202216109>.
- 841 25. Linsky, T.W., Vergara, R., Codina, N., Nelson, J.W., Walker, M.J., Su, W., Barnes, C.O.,  
842 Hsiang, T.Y., Esser-Nobis, K., Yu, K., et al. (2020). De novo design of potent and  
843 resilient hACE2 decoys to neutralize SARS-CoV-2. *Science* 370, 1208-1214.  
844 10.1126/science.abe0075.
- 845 26. Higuchi, Y., Suzuki, T., Arimori, T., Ikemura, N., Mihara, E., Kirita, Y., Ohgitani, E.,  
846 Mazda, O., Motooka, D., Nakamura, S., et al. (2021). Engineered ACE2 receptor therapy  
847 overcomes mutational escape of SARS-CoV-2. *Nature Communications* 12, 3802.  
848 10.1038/s41467-021-24013-y.

- 849 27. Case, J.B., Rothlauf, P.W., Chen, R.E., Liu, Z., Zhao, H., Kim, A.S., Bloyet, L.M., Zeng,  
850 Q., Tahan, S., Droit, L., et al. (2020). Neutralizing Antibody and Soluble ACE2 Inhibition  
851 of a Replication-Competent VSV-SARS-CoV-2 and a Clinical Isolate of SARS-CoV-2.  
852 *Cell Host Microbe*. 10.1016/j.chom.2020.06.021.
- 853 28. Zhang, L., Dutta, S., Xiong, S., Chan, M., Chan, K.K., Fan, T.M., Bailey, K.L., Lindeblad,  
854 M., Cooper, L.M., Rong, L., et al. (2022). Engineered ACE2 decoy mitigates lung injury  
855 and death induced by SARS-CoV-2 variants. *Nat Chem Biol* 18, 342-351.  
856 10.1038/s41589-021-00965-6.
- 857 29. Tada, T., Dcosta, B.M., Zhou, H., and Landau, N.R. (2023). ACE2 Receptor Decoy is a  
858 Potent Prophylactic and Therapeutic for SARS-CoV-2. *bioRxiv*, 2022.2012.2031.522401.  
859 10.1101/2022.12.31.522401.
- 860 30. Guy, J.L., Jackson, R.M., Jensen, H.A., Hooper, N.M., and Turner, A.J. (2005).  
861 Identification of critical active-site residues in angiotensin-converting enzyme-2 (ACE2)  
862 by site-directed mutagenesis. *FEBS J* 272, 3512-3520. 10.1111/j.1742-  
863 4658.2005.04756.x.
- 864 31. Meyer-Berg, H., Zhou Yang, L., Pilar de Lucas, M., Zambrano, A., Hyde, S.C., and Gill,  
865 D.R. (2020). Identification of AAV serotypes for lung gene therapy in human embryonic  
866 stem cell-derived lung organoids. *Stem Cell Res Ther* 11, 448. 10.1186/s13287-020-  
867 01950-x.
- 868 32. van Lieshout, L.P., Domm, J.M., and Wootton, S.K. (2019). AAV-Mediated Gene  
869 Delivery to the Lung. *Methods Mol Biol* 1950, 361-372. 10.1007/978-1-4939-9139-6\_21.
- 870 33. Halbert, C.L., Allen, J.M., and Miller, A.D. (2001). Adeno-associated virus type 6 (AAV6)  
871 vectors mediate efficient transduction of airway epithelial cells in mouse lungs compared  
872 to that of AAV2 vectors. *J Virol* 75, 6615-6624. 10.1128/JVI.75.14.6615-6624.2001.

- 873 34. Tervo, D.G., Hwang, B.Y., Viswanathan, S., Gaj, T., Lavzin, M., Ritola, K.D., Lindo, S.,  
874 Michael, S., Kuleshova, E., Ojala, D., et al. (2016). A Designer AAV Variant Permits  
875 Efficient Retrograde Access to Projection Neurons. *Neuron* 92, 372-382.  
876 10.1016/j.neuron.2016.09.021.
- 877 35. Zhang, Y., Wang, J., Li, J., Chen, Y., Sun, J., Lu, Z., Li, Y., and Liu, T. (2022). Functional  
878 analysis of mutations endowing rAAV2-retro with retrograde tracing capacity. *Neurosci*  
879 *Lett* 784, 136746. 10.1016/j.neulet.2022.136746.
- 880 36. Limberis, M.P., Vandenberghe, L.H., Zhang, L., Pickles, R.J., and Wilson, J.M. (2009).  
881 Transduction efficiencies of novel AAV vectors in mouse airway epithelium in vivo and  
882 human ciliated airway epithelium in vitro. *Mol Ther* 17, 294-301. 10.1038/mt.2008.261.
- 883 37. Halfmann, P.J., Iida, S., Iwatsuki-Horimoto, K., Maemura, T., Kiso, M., Scheaffer, S.M.,  
884 Darling, T.L., Joshi, A., Loeber, S., Singh, G., et al. (2022). SARS-CoV-2 Omicron virus  
885 causes attenuated disease in mice and hamsters. *Nature* 603, 687-692.  
886 10.1038/s41586-022-04441-6.
- 887 38. Zhang, Y.N., Zhang, Z.R., Zhang, H.Q., Li, N., Zhang, Q.Y., Li, X.D., Deng, C.L., Deng,  
888 F., Shen, S., Zhu, B., and Zhang, B. (2022). Different pathogenesis of SARS-CoV-2  
889 Omicron variant in wild-type laboratory mice and hamsters. *Signal Transduct Target*  
890 *Ther* 7, 62. 10.1038/s41392-022-00930-2.
- 891 39. Spitsin, S., Schnepf, B.C., Connell, M.J., Liu, T., Dang, C.M., Pappa, V., Tustin, R.,  
892 Kinder, A., Johnson, P.R., and Douglas, S.D. (2020). Protection against SIV in Rhesus  
893 Macaques Using Albumin and CD4-Based Vector-Mediated Gene Transfer. *Molecular*  
894 *therapy. Methods & clinical development* 17, 1088-1096. 10.1016/j.omtm.2020.04.019.



- 895 40. Wang, D., Tai, P.W.L., and Gao, G. (2019). Adeno-associated virus vector as a platform  
896 for gene therapy delivery. *Nature Reviews Drug Discovery* 18, 358-378.  
897 10.1038/s41573-019-0012-9.
- 898 41. Mingozzi, F., and High, K.A. (2013). Immune responses to AAV vectors: overcoming  
899 barriers to successful gene therapy. *Blood* 122, 23-36. 10.1182/blood-2013-01-306647.
- 900 42. Desch, A.N., Henson, P.M., and Jakubzick, C.V. (2013). Pulmonary dendritic cell  
901 development and antigen acquisition. *Immunol Res* 55, 178-186. 10.1007/s12026-012-  
902 8359-6.
- 903 43. Tosolini, A.P., and Sleight, J.N. (2020). Intramuscular Delivery of Gene Therapy for  
904 Targeting the Nervous System. *Front Mol Neurosci* 13, 129. 10.3389/fnmol.2020.00129.
- 905 44. Levin, M.J., Ustianowski, A., De Wit, S., Launay, O., Avila, M., Templeton, A., Yuan, Y.,  
906 Seegobin, S., Ellery, A., Levinson, D.J., et al. (2022). Intramuscular AZD7442  
907 (Tixagevimab-Cilgavimab) for Prevention of Covid-19. *N Engl J Med*.  
908 10.1056/NEJMoa2116620.
- 909 45. Miguez-Rey, E., Choi, D., Kim, S., Yoon, S., and Sandulescu, O. (2022). Monoclonal  
910 antibody therapies in the management of SARS-CoV-2 infection. *Expert Opin Investig*  
911 *Drugs* 31, 41-58. 10.1080/13543784.2022.2030310.
- 912 46. Sims, J.J., Lian, S., Meggersee, R.L., Kasimsetty, A., and Wilson, J.M. (2022). High  
913 activity of an affinity-matured ACE2 decoy against Omicron SARS-CoV-2 and pre-  
914 emergent coronaviruses. *PLoS One* 17, e0271359. 10.1371/journal.pone.0271359.
- 915 47. Tada, T., Norton, T.D., Leibowitz, R., and Landau, N.R. (2022). Directly injected lentiviral  
916 vector-based T cell vaccine protects mice against acute and chronic viral infection. *JCI*  
917 *Insight*. 10.1172/jci.insight.161598.

- 918 48. Li, C., and Samulski, R.J. (2020). Engineering adeno-associated virus vectors for gene  
919 therapy. *Nat Rev Genet* 21, 255-272. 10.1038/s41576-019-0205-4.
- 920 49. Martinez-Navio, J.M., Fuchs, S.P., Mendes, D.E., Rakasz, E.G., Gao, G., Lifson, J.D.,  
921 and Desrosiers, R.C. (2020). Long-Term Delivery of an Anti-SIV Monoclonal Antibody  
922 With AAV. *Front Immunol* 11, 449. 10.3389/fimmu.2020.00449.
- 923 50. Naso, M.F., Tomkowicz, B., Perry, W.L., 3rd, and Strohl, W.R. (2017). Adeno-Associated  
924 Virus (AAV) as a Vector for Gene Therapy. *BioDrugs* 31, 317-334. 10.1007/s40259-017-  
925 0234-5.
- 926 51. Wu, Z., Asokan, A., and Samulski, R.J. (2006). Adeno-associated virus serotypes: vector  
927 toolkit for human gene therapy. *Mol Ther* 14, 316-327. 10.1016/j.ymthe.2006.05.009.
- 928 52. Weiss, A.R., Liguore, W.A., Domire, J.S., Button, D., and McBride, J.L. (2020). Intra-  
929 striatal AAV2.retro administration leads to extensive retrograde transport in the rhesus  
930 macaque brain: implications for disease modeling and therapeutic development. *Sci Rep*  
931 10, 6970. 10.1038/s41598-020-63559-7.
- 932 53. Sims, J.J., Greig, J.A., Michalson, K.T., Lian, S., Martino, R.A., Meggersee, R., Turner,  
933 K.B., Nambiar, K., Dyer, C., Hinderer, C., et al. (2021). Intranasal gene therapy to  
934 prevent infection by SARS-CoV-2 variants. *PLoS Pathog* 17, e1009544.  
935 10.1371/journal.ppat.1009544.
- 936 54. Lana, M.G., and Strauss, B.E. (2020). Production of Lentivirus for the Establishment of  
937 CAR-T Cells. *Methods Mol Biol* 2086, 61-67. 10.1007/978-1-0716-0146-4\_4.
- 938 55. Lundstrom, K. (2021). Viral Vectors for COVID-19 Vaccine Development. *Viruses* 13.  
939 10.3390/v13020317.

- 940 56. Ku, M.W., Authie, P., Nevo, F., Souque, P., Bourguine, M., Romano, M., Charneau, P.,  
941 and Majlessi, L. (2021). Lentiviral vector induces high-quality memory T cells via  
942 dendritic cells transduction. *Commun Biol* 4, 713. 10.1038/s42003-021-02251-6.
- 943 57. Kamath, A.T., Henri, S., Battye, F., Tough, D.F., and Shortman, K. (2002).  
944 Developmental kinetics and lifespan of dendritic cells in mouse lymphoid organs. *Blood*  
945 100, 1734-1741.
- 946 58. van Furth, R. (1989). Origin and turnover of monocytes and macrophages. *Curr Top*  
947 *Pathol* 79, 125-150.
- 948 59. Rawlins, E.L., and Hogan, B.L. (2008). Ciliated epithelial cell lifespan in the mouse  
949 trachea and lung. *Am J Physiol Lung Cell Mol Physiol* 295, L231-234.  
950 10.1152/ajplung.90209.2008.
- 951 60. Mehrabadi, A.Z., Ranjbar, R., Farzanehpour, M., Shahriary, A., Dorostkar, R.,  
952 Hamidinejad, M.A., and Ghaleh, H.E.G. (2022). Therapeutic potential of CAR T cell in  
953 malignancies: A scoping review. *Biomed Pharmacother* 146, 112512.  
954 10.1016/j.biopha.2021.112512.
- 955 61. Mohanty, R., Chowdhury, C.R., Arega, S., Sen, P., Ganguly, P., and Ganguly, N. (2019).  
956 CAR T cell therapy: A new era for cancer treatment (Review). *Oncol Rep* 42, 2183-2195.  
957 10.3892/or.2019.7335.
- 958 62. Sterner, R.C., and Sterner, R.M. (2021). CAR-T cell therapy: current limitations and  
959 potential strategies. *Blood Cancer Journal* 11, 69. 10.1038/s41408-021-00459-7.
- 960 63. Akerman, A., Milogiannakis, V., Jean, T., Esneu, C., Silva, M.R., Ison, T., Fitcher, C.,  
961 Lopez, J.A., Chandra, D., Naing, Z., et al. (2022). Emergence and antibody evasion of  
962 BQ and BA.2.75 SARS-CoV-2 sublineages in the face of maturing antibody breadth at

- 963 the population level. medRxiv, 2022.2012.2006.22283000.  
964 10.1101/2022.12.06.22283000.
- 965 64. Demogines, A., Farzan, M., and Sawyer, S.L. (2012). Evidence for ACE2-Utilizing  
966 Coronaviruses (CoVs) Related to Severe Acute Respiratory Syndrome CoV in Bats.  
967 *Journal of Virology* 86, 6350-6353. 10.1128/jvi.00311-12.
- 968 65. Wacharapluesadee, S., Tan, C.W., Maneeorn, P., Duengkae, P., Zhu, F., Joyjinda, Y.,  
969 Kaewpom, T., Chia, W.N., Ampoot, W., Lim, B.L., et al. (2021). Evidence for SARS-CoV-  
970 2 related coronaviruses circulating in bats and pangolins in Southeast Asia. *Nature*  
971 *Communications* 12, 972. 10.1038/s41467-021-21240-1.
- 972 66. Aurnhammer, C., Haase, M., Muether, N., Hausl, M., Rauschhuber, C., Huber, I.,  
973 Nitschko, H., Busch, U., Sing, A., Ehrhardt, A., and Baiker, A. (2012). Universal real-time  
974 PCR for the detection and quantification of adeno-associated virus serotype 2-derived  
975 inverted terminal repeat sequences. *Hum Gene Ther Methods* 23, 18-28.  
976 10.1089/hgtb.2011.034.
- 977 67. Winkler, E.S., Bailey, A.L., Kafai, N.M., Nair, S., McCune, B.T., Yu, J., Fox, J.M., Chen,  
978 R.E., Earnest, J.T., Keeler, S.P., et al. (2020). SARS-CoV-2 infection of human ACE2-  
979 transgenic mice causes severe lung inflammation and impaired function. *Nature*  
980 *Immunology* 21, 1327-1335. 10.1038/s41590-020-0778-2.
- 981 68. Corman, V.M., Landt, O., Kaiser, M., Molenkamp, R., Meijer, A., Chu, D.K., Bleicker, T.,  
982 Brunink, S., Schneider, J., Schmidt, M.L., et al. (2020). Detection of 2019 novel  
983 coronavirus (2019-nCoV) by real-time RT-PCR. *Euro Surveill* 25. 10.2807/1560-  
984 7917.ES.2020.25.3.2000045.
- 985

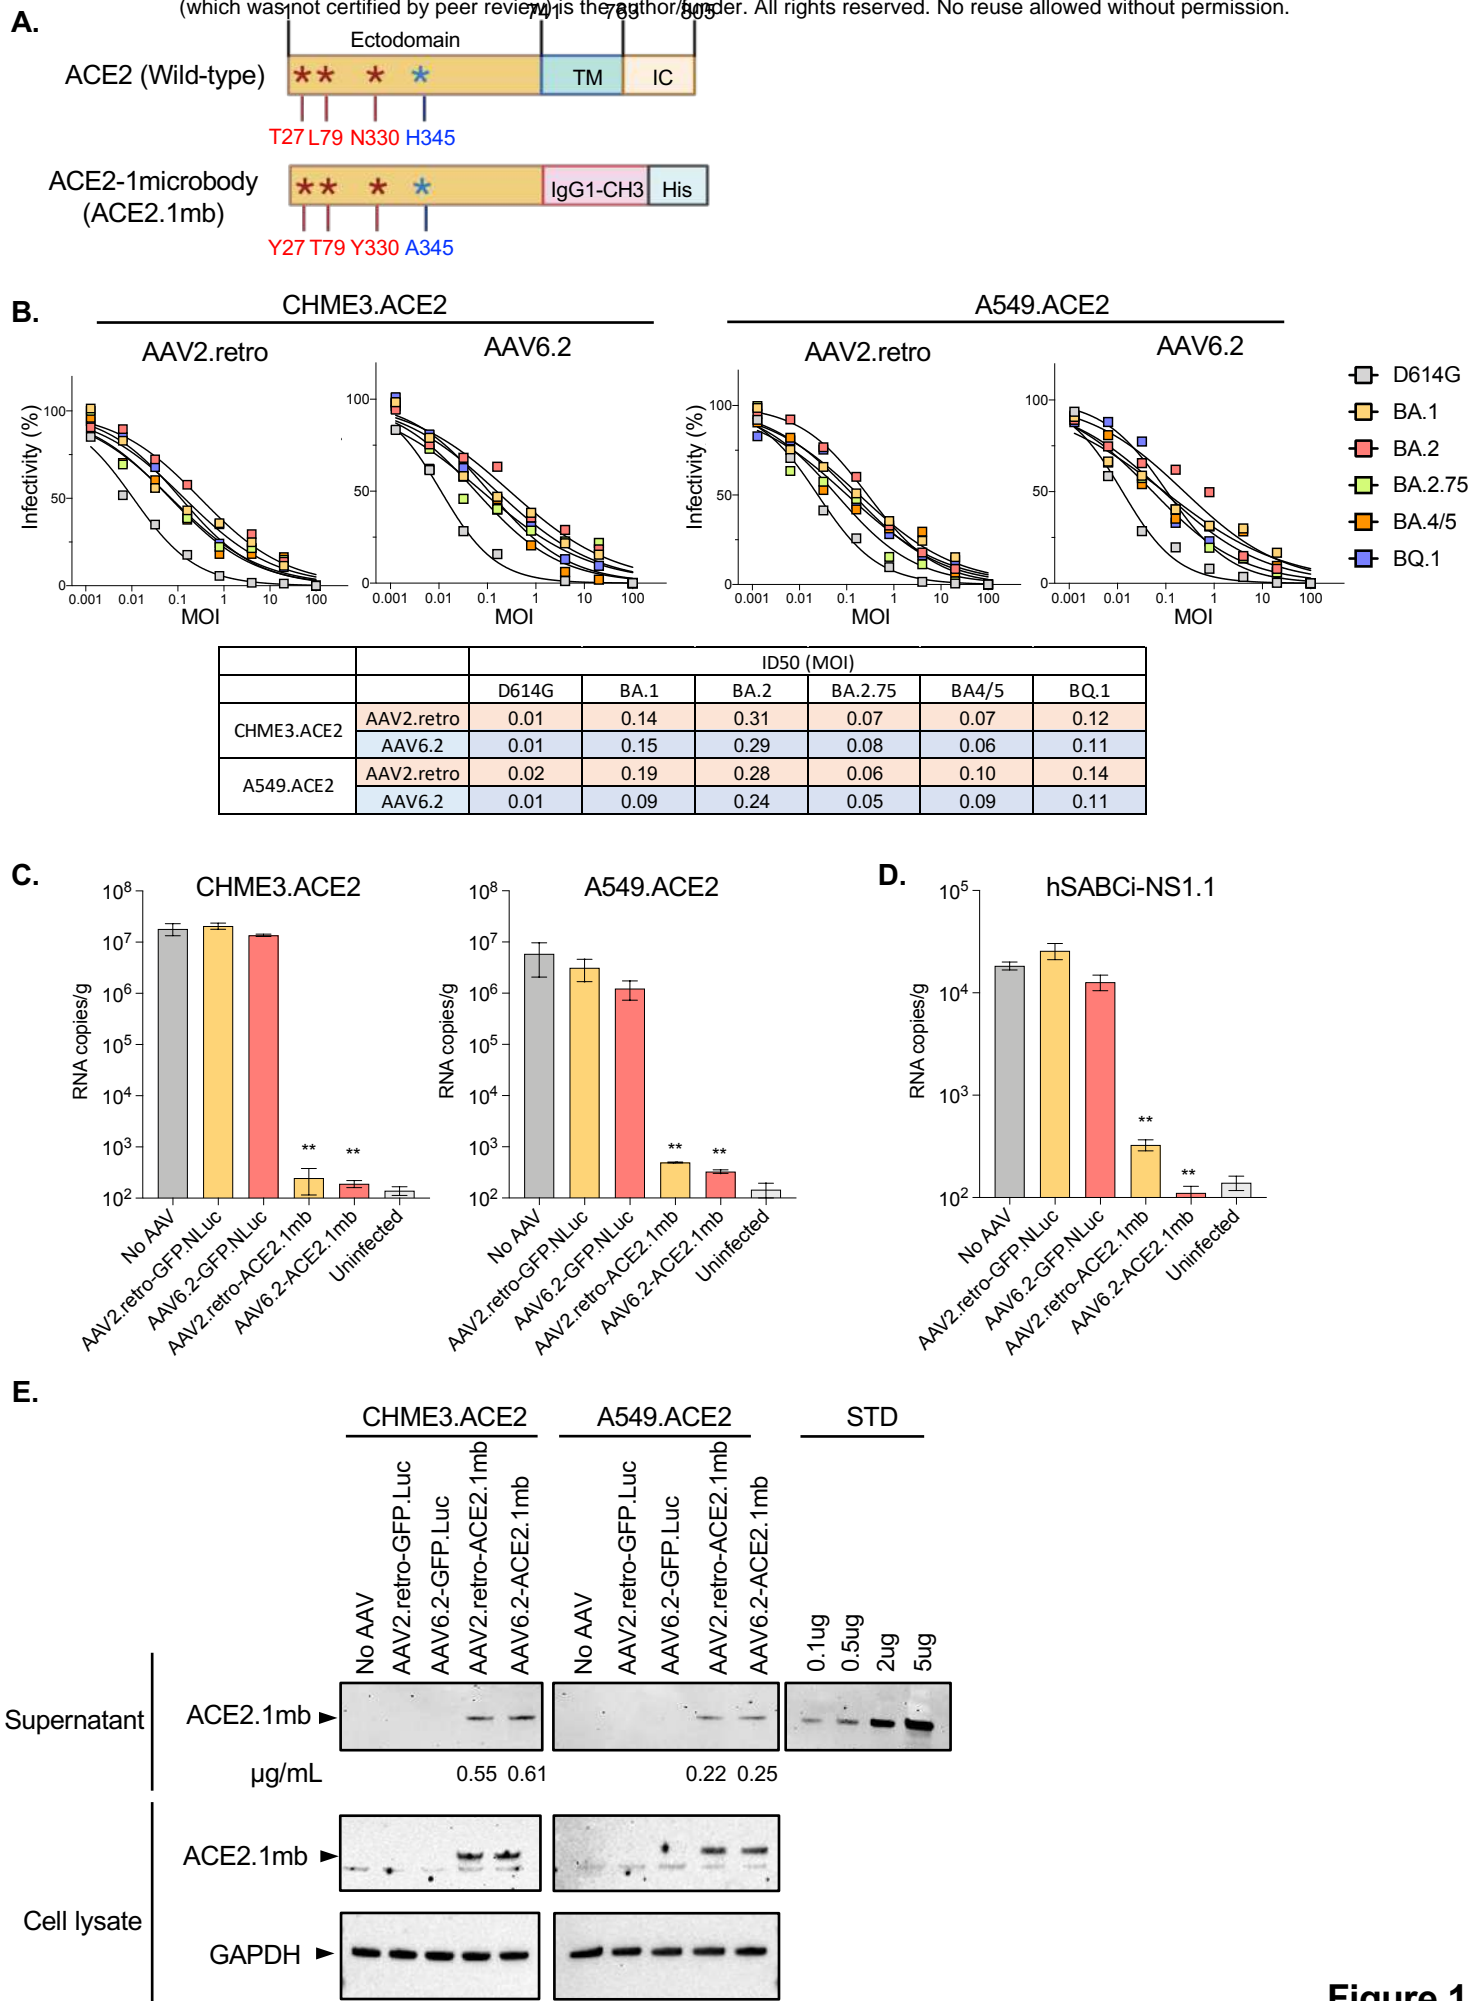

Figure 1

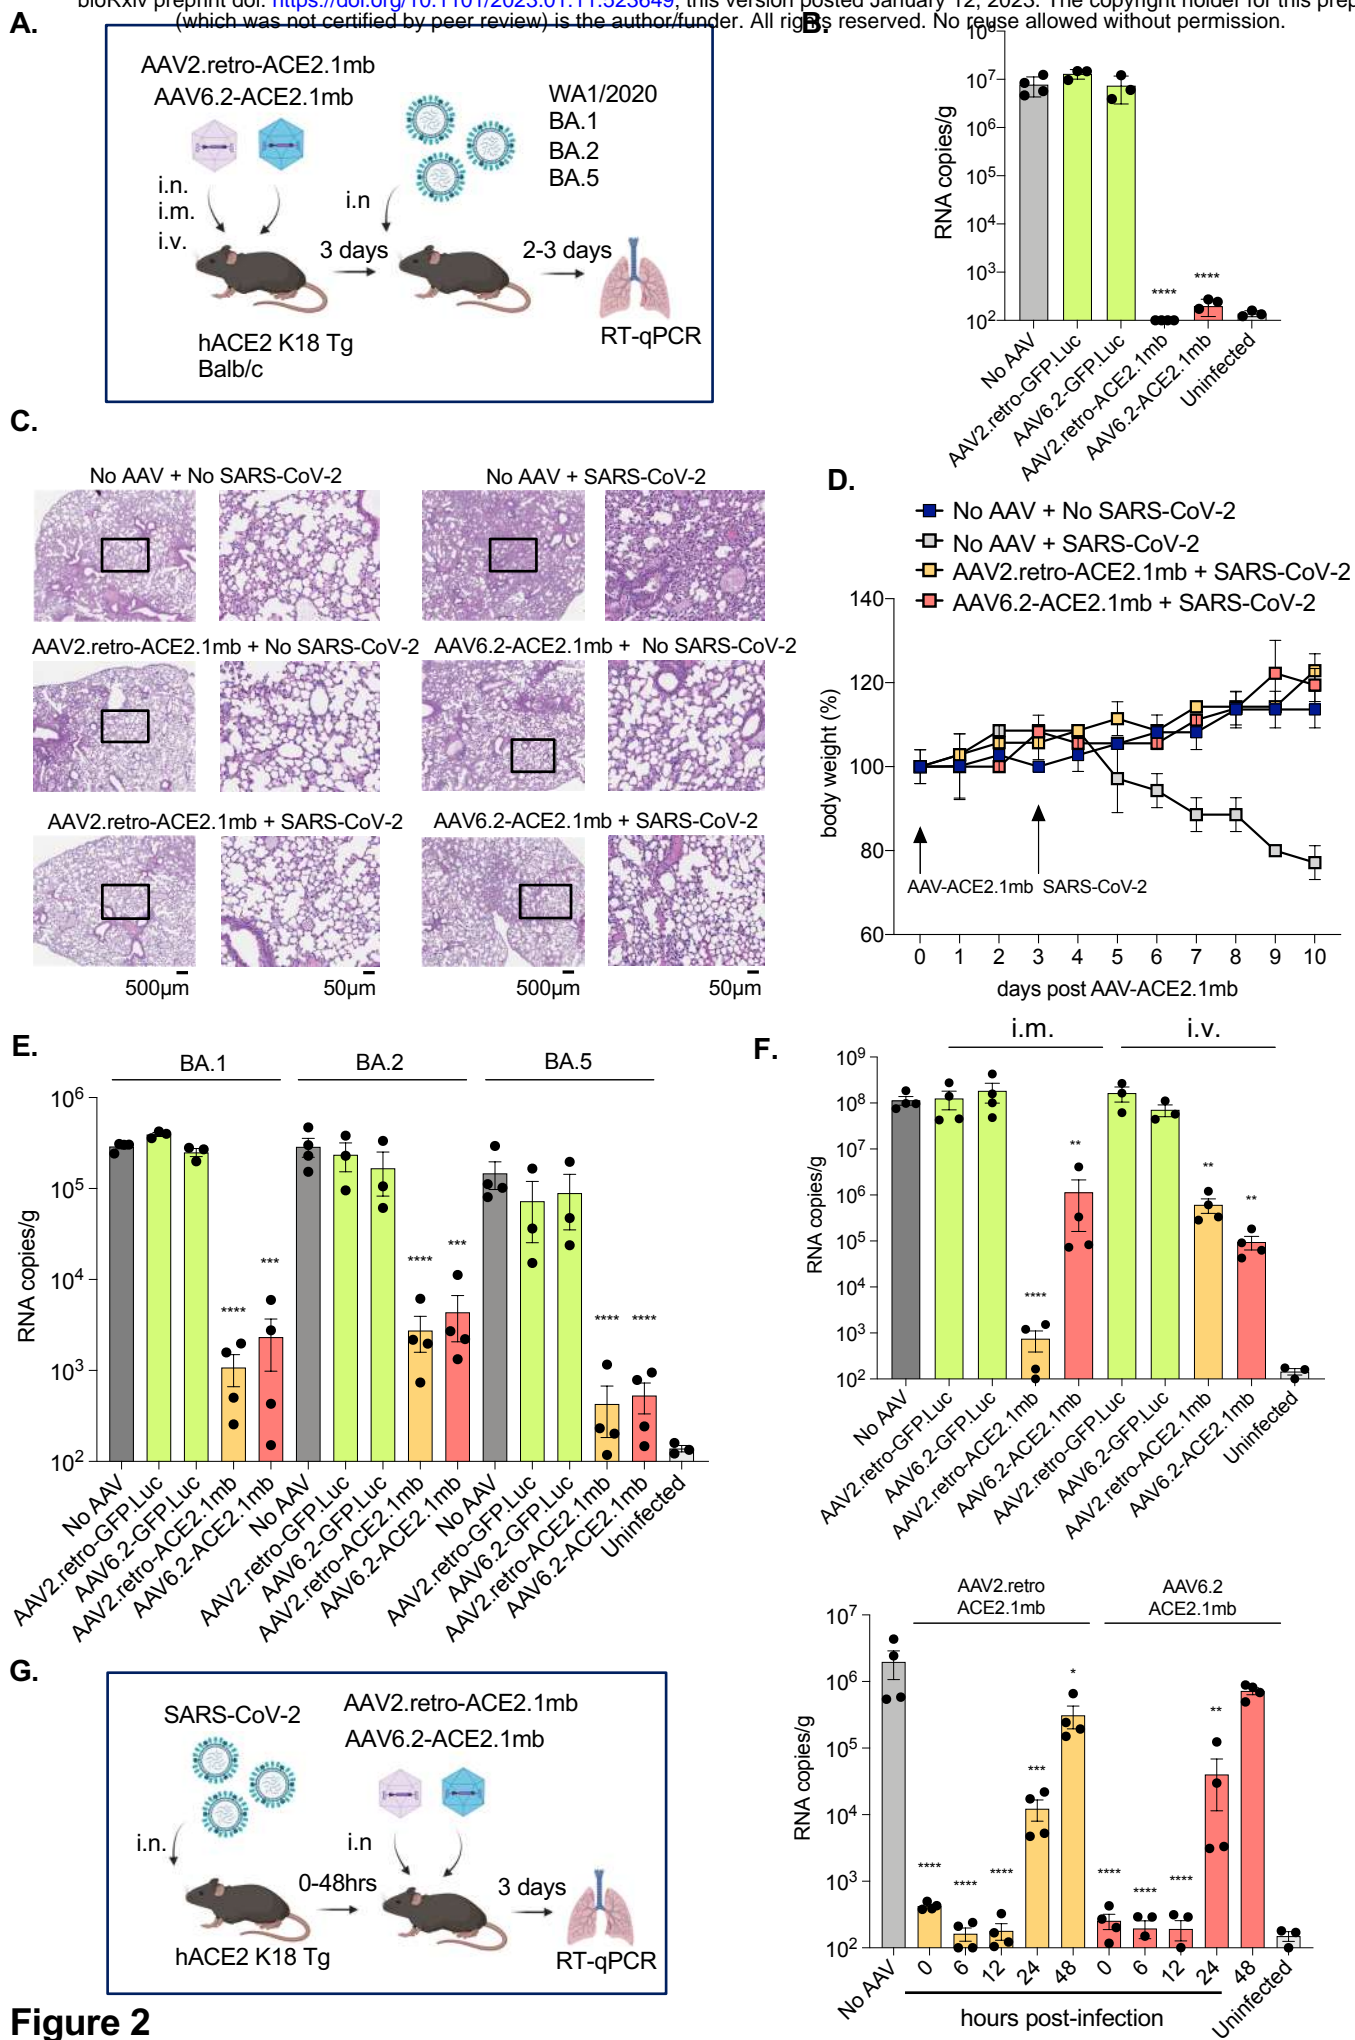

**Figure 2**

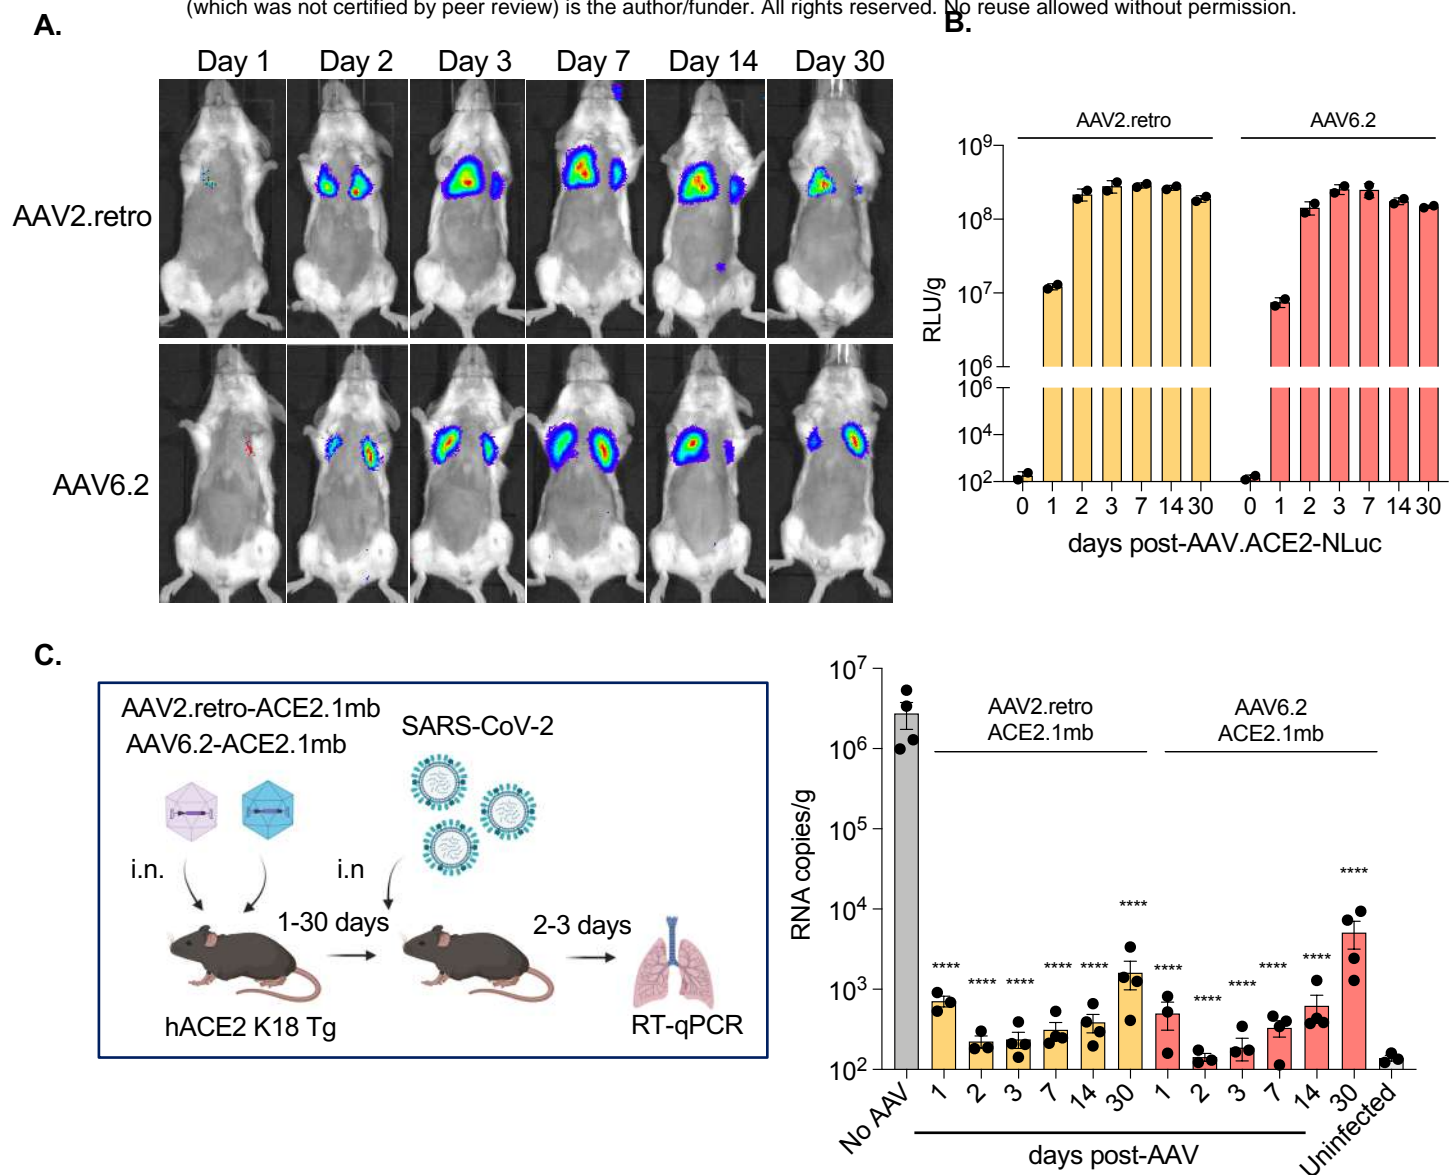

**Figure 3**

**A.**

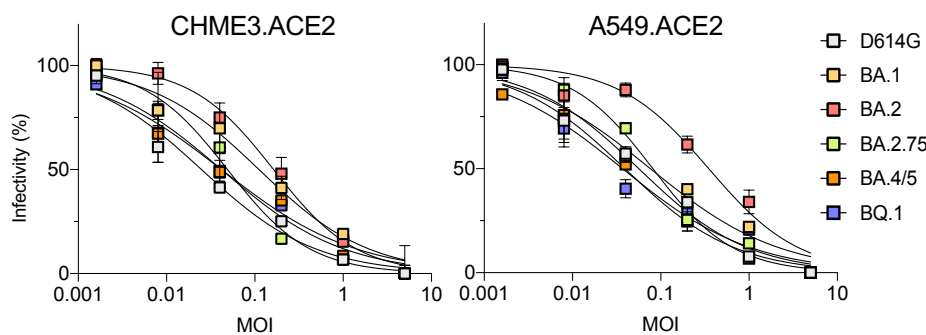

|            | ID50 (MOI) |      |      |         |        |      |
|------------|------------|------|------|---------|--------|------|
|            | D614G      | BA.1 | BA.2 | BA.2.75 | BA.4/5 | BQ.1 |
| CHME3.ACE2 | 0.02       | 0.11 | 0.16 | 0.05    | 0.04   | 0.04 |
| A549.ACE2  | 0.06       | 0.08 | 0.35 | 0.08    | 0.04   | 0.04 |

**B.**

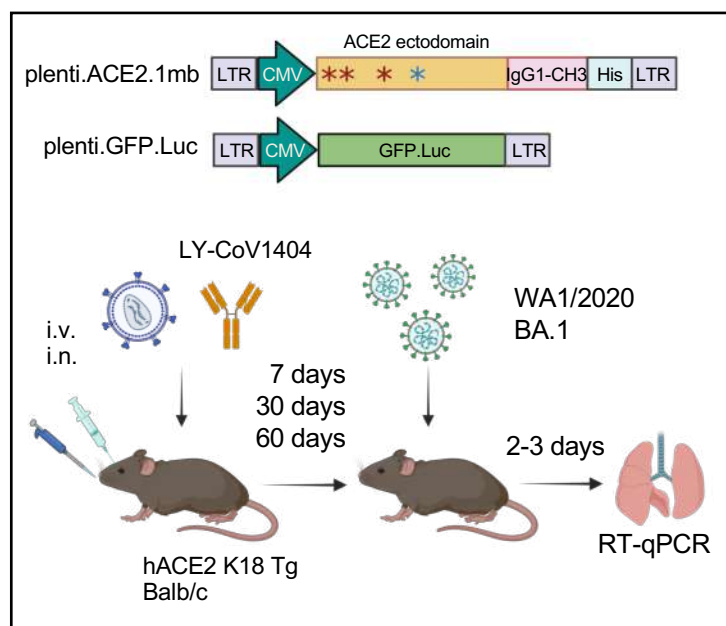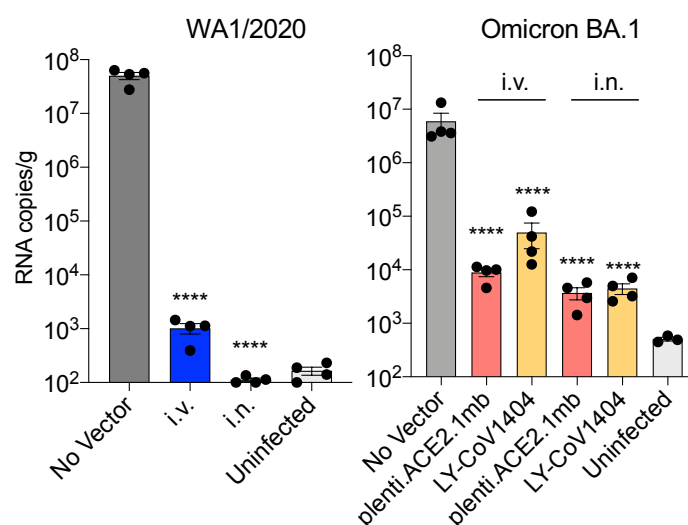

**C.**

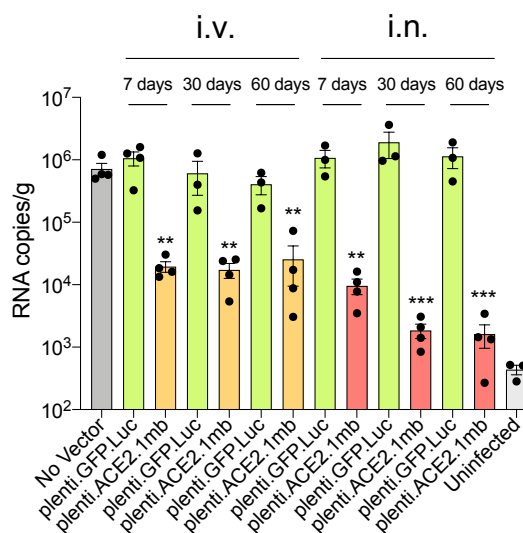

**D.**

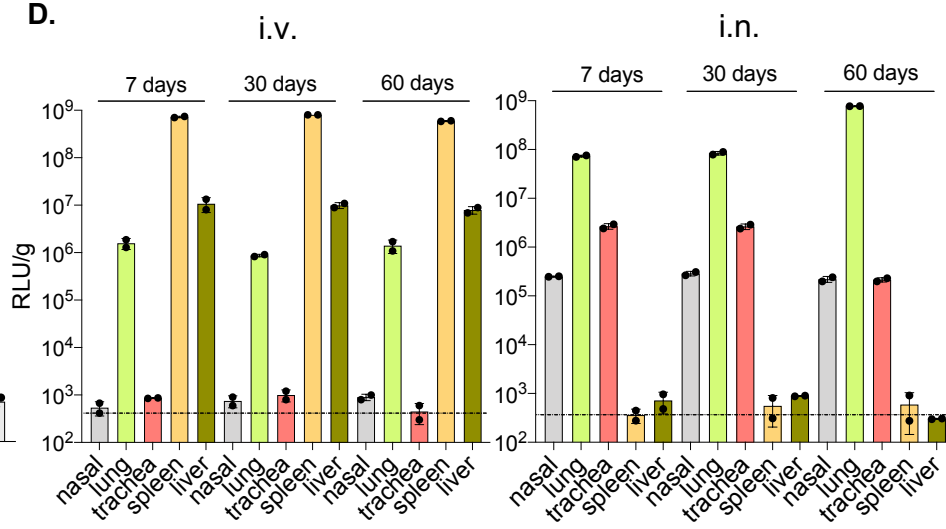

**Figure 4**



**A.**

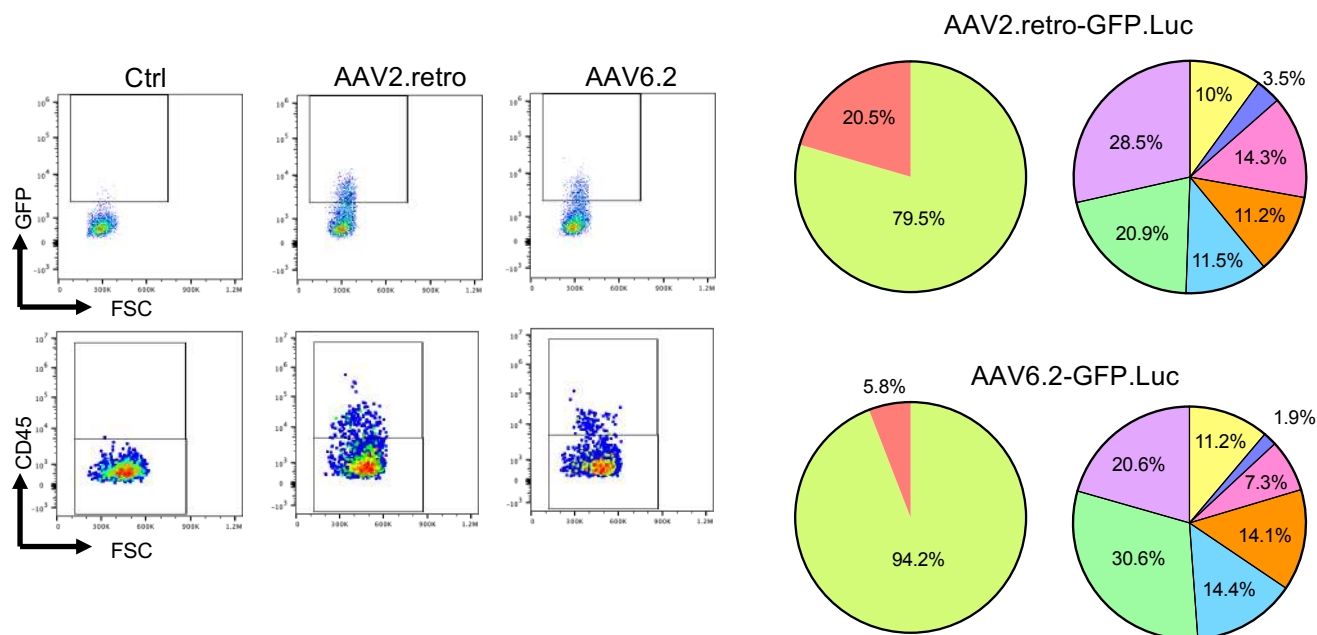

**B.**

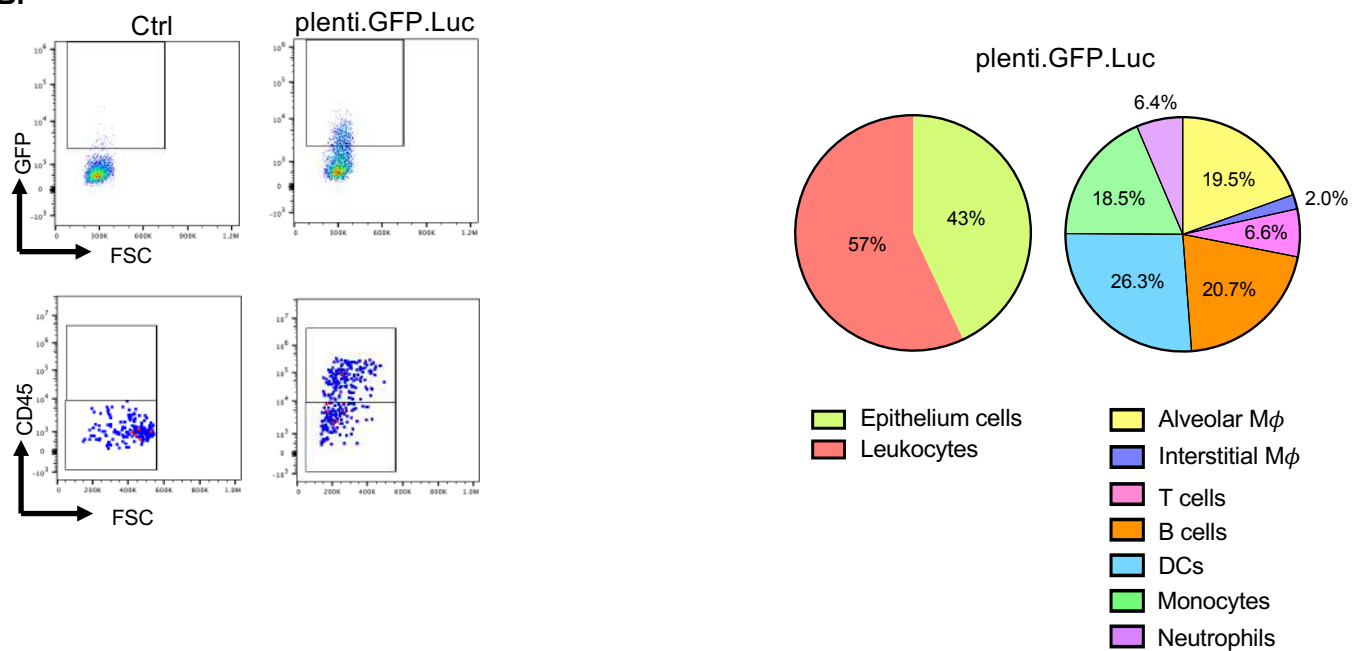

**Figure 5**

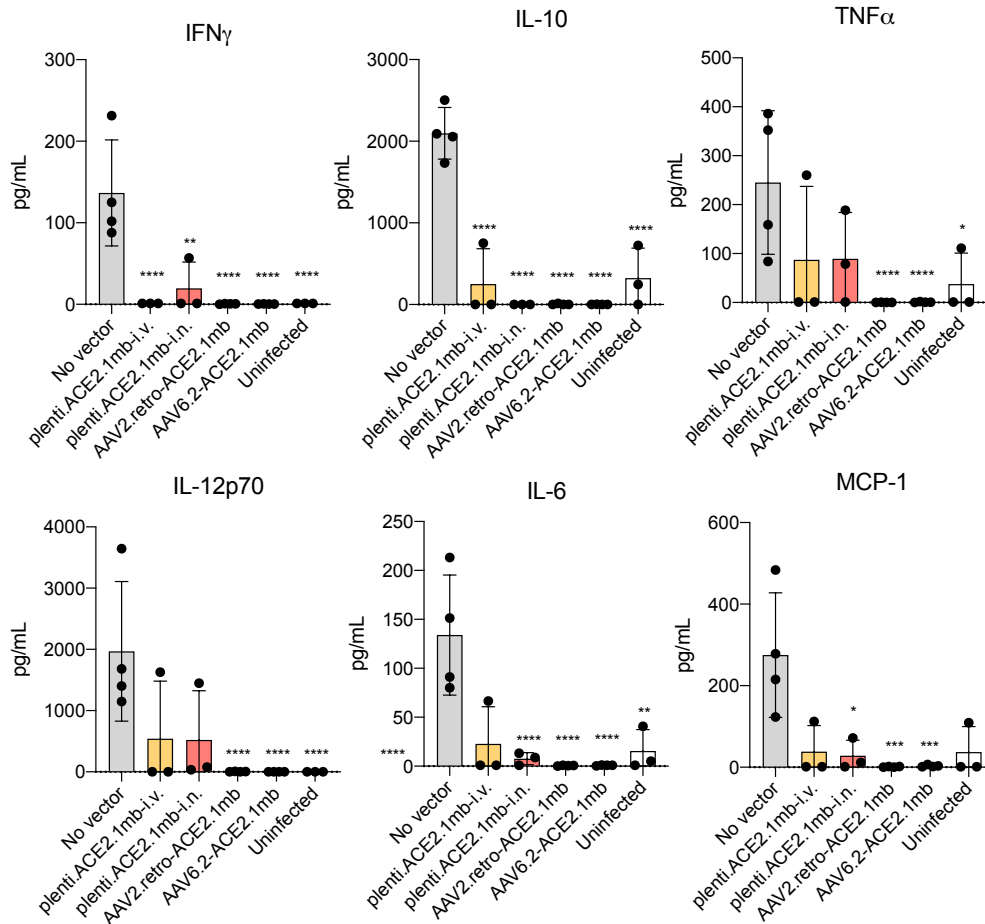

**Figure S1. Intranasal injected AAV2.retro, AAV6.2-decoys and lentivirus-based ACE2.1mb didn't induce any inflammatory cytokine secretion.**

Mice (n=4) were treated with the decoy-expressing AAV vectors ( $1 \times 10^{12}$  IU) or decoy-expressing lentiviral vector ( $5 \times 10^6$  IU). After 3 (AAV) or 7days (lentiviral vector), the mice were challenged with SARS-CoV-2 WA1/2020 and 3-dpi the levels of IFN $\gamma$ , TNF $\alpha$ , IL-10, IL-6, MCP-1 and IL-12p70 in lung were measured by cytokine beads array. The Y-axis shows the concentration of each cytokine. The experiment was done twice with similar results. Confidence intervals are shown as the mean  $\pm$  SD. \*P  $\leq$  0.05, \*\*P  $\leq$  0.01, \*\*\*P  $\leq$  0.001, \*\*\*\*P  $\leq$  0.0001.

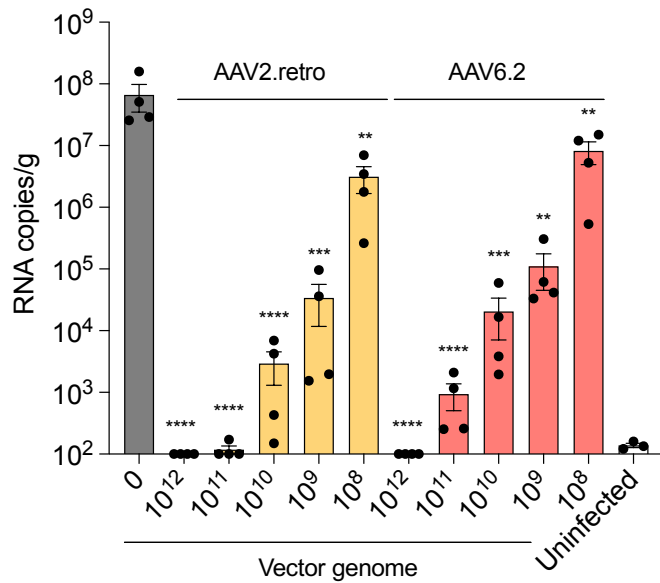

**Figure S2. AAV-Decoy protected mice from SARS-CoV-2 infection.**

Different doses of decoy-expressing AAV vectors ( $1 \times 10^{12}$ ,  $1 \times 10^{11}$ ,  $1 \times 10^{10}$ ,  $1 \times 10^9$ ,  $1 \times 10^8$  vg) were administered to hACE2 K18 Tg (n=4) by i.n. instillation. 3 days post-AAV injection, mice were challenged with  $1 \times 10^4$  PFU of SARS-CoV-2 WA1/2020. At 3-dpi, subgenomic viral E gene RNA in the lung were quantified. Confidence intervals are shown as the mean  $\pm$  SD. \*\* $P \leq 0.01$ , \*\*\* $P \leq 0.001$ , \*\*\*\* $P \leq 0.0001$ . The experiment was done twice with similar results.

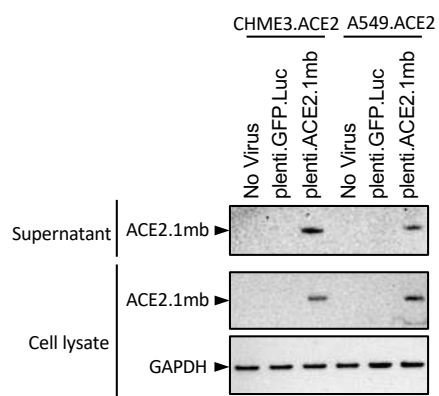

**Figure S3. Lentivirus-based ACE2.1mb protected mice from SARS-CoV-2 infection.**

CHME3.ACE2 and A549.ACE2 cells were transduced with decoy-expressing lentiviral vectors at an MOI of 0.5. 3-dpi, decoy protein secreted into the supernatant was pulled-down on NTA beads and bead-bound decoy protein was detected on an immunoblot probed with His-tag antibody. Decoy protein in the cell lysates is shown below with GAPDH as a loading control.

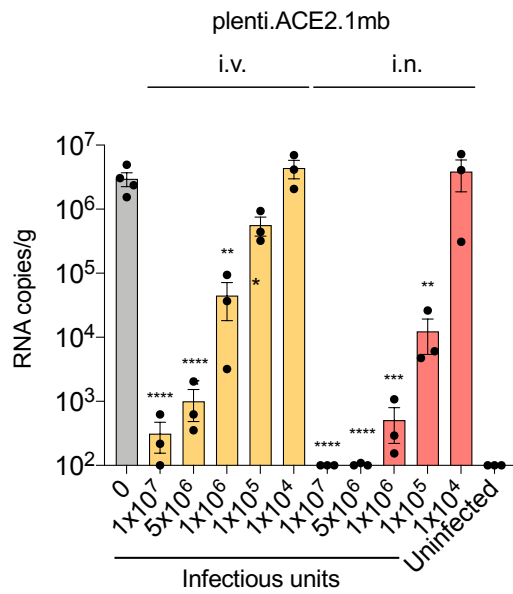

**Figure S4. Lentivirus-based ACE2.1mb protect mice from SARS-CoV-2 infection.**

hACE2 K18 Tg mice (n=3) were injected i.v. or i.n. with different amounts of decoy-expressing lentiviral vectors ( $1 \times 10^7$ ,  $1 \times 10^6$ ,  $1 \times 10^5$ ,  $1 \times 10^4$  IU). One week later, the mice were challenged with  $1 \times 10^4$  PFU SARS-COV-2. At 3-dpi, lung subgenomic viral E RNA was quantified by RT-PCR. Confidence intervals are shown as the mean  $\pm$  SD. \*\* $P \leq 0.01$ , \*\*\* $P \leq 0.001$ , \*\*\*\* $P \leq 0.0001$ .
